**Production location of the gelling agent Phytigel has a significant impact on *Arabidopsis thaliana* seedling phenotypic analysis**

Caitlin N. Jacques<sup>1,2</sup>, Anna K. Hulbert<sup>2\*</sup>, Shelby Westenskow<sup>2\*</sup>, Michael M. Neff<sup>1,2</sup>

<sup>1</sup>Graduate Program in Molecular Plant Sciences, Washington State University, Pullman, WA, USA

<sup>2</sup>The Department of Crop and Soil Sciences, Washington State University, Pullman, WA, USA

\*Authors contributed equally to this work

# Abstract

**Background:** Recently, it was found that 1% Phytigel plates used to conduct *Arabidopsis thaliana* seedling phenotypic analysis no longer reproduced previously published results. This Phytigel, which is produced in China (Phytigel C), has replaced American-made Phytigel (Phytigel), which is no longer commercially available. In this study, we present the impact of Phytigel produced in the United States vs. China on seedling phenotypic analysis. As a part of this study, an alternative gelling agent has been identified that is capable of reproducing previously published seedling morphometrics.

**Results:** Phytigel and Phytigel C were investigated based on their ability to reproduce the subtle phenotype of the *sob3-4 esc-8* double mutant. Fluence-rate-response analysis of seedlings grown on 1% Phytigel C plates failed to replicate the *sob3-4 esc-8* subtle phenotype seen on 1% Phytigel. Furthermore, root penetrance analysis showed a significant difference between *sob3-4 esc-8* seedlings grown on 1% Phytigel and 1% Phytigel C. It was also found that 1% Phytigel C was significantly harder than 1% Phytigel. As a replacement for Phytigel C, Gellan was tested. 1% Gellan was able to reproduce the subtle phenotype of *sob3-4 esc-8*. Furthermore, there was no significant difference in root penetration of the wild type or *sob3-4 esc-8* seedlings between 1% Phytigel and 1% Gellan. This may be due to the significant reduction in hardness in 1% Gellan plates compared to 1% Phytigel plates. Finally, we tested additional concentrations of Gellan and found that seedlings on 0.6% Gellan looked more uniform while also being able to reproduce previously published results.

**Conclusions:** Phytigel has been the standard gelling agent for several studies involving the characterization of subtle seedling phenotypes. After production was moved to China, Phytigel C was no longer capable of reproducing these previously published results. An alternative gelling agent, Gellan, was able to reproduce previously published seedling phenotypes at both 1% and 0.6% concentrations. The information provided in this manuscript is beneficial to the scientific community as a whole, specifically phenomics labs, as it details key problematic differences between gelling agents that should be performing identically (Phytigel and Phytigel C).

# Background

The study of phenomics in *Arabidopsis thaliana* (*A. thaliana*) is the focus of many molecular and physiology labs worldwide. One of the ways that *A. thaliana* growth and development can be studied is through the use of agar plates. The use of agar plates for the study of *A. thaliana* has many benefits, including affordability, transparency, ease, and most importantly, reproducibility.

Agar plates are made with agar derived from red algae, or more commonly, by agar substitutes. One of the common agar substitutes is Phytigel (Sigma). Phytigel is produced from a bacterial substrate that is composed of rhamnose, glucuronic acid, and glucose (1). Phytigel creates a clear, colorless growth matrix for plants. Another widely used agar substitute is gellan gum. Gellan Gum (Gellan) (PhytoTechnology Laboratories, Inc.) is produced by bacterial fermentation of *Sphingomonas elodea*, which creates a high molecular weight polysaccharide gum. This gum is composed of repeating tetrasaccharide units that will form a gel in the presence of mono- or divalent cations (2).

Agar gels allow for the seeds of small plants, such as *A. thaliana*, to be grown and phenotyped in controlled environments. Agar plates are especially important when studying *A. thaliana* plants with subtle phenotypes. An activation tagging screen was conducted to identify suppressors of the long hypocotyl phenotype conferred by the weak, missense *phyB-4* mutant allele (3-9). From the activation tagging screen, *SUPPRESSOR OF PHYTOCHROME B-4 #3* (*SOB3*) and its closest paralog, *ESCAROLA* (*ESC*), were identified (3-4, 9). Null alleles of both *SOB3* and *ESC* were identified as *sob3-4* and *esc-8*, respectively (9). It was observed that the *sob3-4 esc-8*

double mutant produced a subtle hypocotyl phenotype that was taller than the wild type (WT), but shorter than the extreme-tall phenotype of the dominant-negative *sob3-6* allele (9,10).

A 1% Phytigel plate was used as a standard to conduct all of the aforementioned phenomics research. Additionally, 1% Phytigel plates have been used to reproduce the results of the *sob3-6* mutant (11), as well as in new research with the subtle phenotypes of *A. thaliana* NAC Domain Containing Protein 81 (ATAF2) mutants (12). Therefore, 1% Phytigel plates are sufficient for phenotypic analysis of subtle mutant phenotypes and the results are reproducible.

Recently, Sigma began producing Phytigel in China (Phytigel C). We compared growth of *A. thaliana* seedlings on plates made with American-made Phytigel (Phytigel) to their growth on plates made with Phytigel C. We included another gelling agent, Gellan, produced by PhytoTechnology Laboratories Inc., in our experimentation. The purpose of these experiments was to explore how different gelling agents performed under light intensities commonly used for seedlings phenomics, and to possibly indicate the gelling agent that produced the most uniform germination, root penetrance, and/or hypocotyl fluence rate responses. In this study we present the impact of Phytigel produced in the United States vs. China on seedling phenotypic analysis. As a part of this study, an alternative gelling agent has been identified that is capable of reproducing previously published seedling morphometrics.

## Results

Hypocotyl length measurements, as well as fluence-rate-response analysis, have been used to elucidate the subtle mutant phenotypes, such as *phyB-4* (3) and *sob3-4 esc-8* (9). The standard for these experiments is 1% Phytigel media (3,9,11). The differences between these

subtle phenotypes can be best observed at a white light intensity of  $10 \mu\text{mol m}^{-2}\text{s}^{-1}$  (Fig 1; Fig 2, A and C) (9). The *sob3-4 esc-8* double mutant has been observed to be significantly taller than the WT, but shorter than *sob3-6* (9). This difference in average hypocotyl length between WT and *sob3-4 esc-8* on 1% American-made Phytagel is statistically significant (Fig 2, B), but this difference is not statistically significant on 1% Phytagel C media (Fig 2, D). However, both Phytagel and Phytagel C are able to distinguish the difference between the WT and more severe mutant phenotypes conferred by *SOB3-D* and *sob3-6* (Fig 2, B and D). In addition, the length of the hypocotyls for all genotypes are significantly different (at least  $p < 0.01$ ) between 1% Phytagel C media and 1% Phytagel media (Fig 2, B and D). This led us to suspect that there may be an issue with seedling germination or seedling development on Phytagel C media. Therefore, we conducted germination and root penetrance assays to determine if either of these factors are impacted by Phytagel C media.

**Fig 1: Pictures of seedlings grown on 1% media at  $10 \mu\text{mol m}^{-2}\text{s}^{-1}$  for six days.**

**A)** 6-day-old seedlings grown on 1% Phytagel at  $10 \mu\text{mol m}^{-2}\text{s}^{-1}$ . **B)** 6-day-old seedlings grown on 1% Phytagel C at  $10 \mu\text{mol m}^{-2}\text{s}^{-1}$ .

**Fig 2: Fluence rate responses of 6-day-old seedlings on 1% Phytagel and 1% Phytagel C plates**

**A)** Fluence rate responses of 6-day-old seedlings that have been normalized to the dark control on plates containing 1% Phytagel media. **B)** Graphical representation of 6-day-old seedlings that have been normalized to the dark control on plates containing 1% Phytagel media. **C)** Fluence rate responses of 6-day-old seedlings that have been normalized to the dark control on plates containing 1% Phytagel C media. **D)** Graphical representation of 6-day-old seedlings that have been normalized to the dark control on plates containing 1% Phytagel media. Standard error is

shown for all data sets. In a Welch's t test (unpaired two-tailed t test with unequal variance) compared with the wild type:  $P > 0.05 = \text{NS}$ ,  $P \leq 0.0001 = ****$

Germination rates were calculated for each of the four genotypes (WT, *sob3-6*, *SOB3-D*, and *sob3-4 esc-8*) on 1% Phytagel and 1% Phytagel C plates at different light intensities (10, 60, and 100  $\mu\text{mol m}^{-2} \text{s}^{-1}$ ). No trends were observed that would indicate a clear connection between gelling agent and percent germination (see S1). However, root penetrance was impacted by growth on 1% Phytagel C media. It was found that there is no significant difference between Phytagel and Phytagel C at 10 and 100  $\mu\text{mol m}^{-2} \text{s}^{-1}$  for the WT, but there is a significant difference at 60  $\mu\text{mol m}^{-2} \text{s}^{-1}$  (Fig 3, A). Furthermore, the average percent root penetrance for *sob3-4 esc-8* at all light intensities were statistically different between 1% Phytagel and 1% Phytagel C plates (Fig 3, B), suggesting that there is physical difference between these two gelling agents. In order to test if the Phytagel was physically different from Phytagel C, a hardness analysis was performed (Fig 4). The 1% Phytagel C plates were significantly harder than the 1% Phytagel plates (Fig 4), which may explain the root penetrance data in Fig 3.

**Fig 3: Average root penetrance of 6-day-old seedlings on 1% Phytagel and 1% Phytagel C plates**

**A)** Average root penetrance of 6-day-old WT seedlings on Phytagel and Phytagel C at increasing light concentrations. **B)** Average root penetrance of 6-day-old *sob3-4 esc-8* seedlings on Phytagel and Phytagel C at increasing light concentrations. Standard error is shown for all data sets. In a Welch's t test (unpaired two-tailed t test with unequal variance) compared with Phytagel:  $P > 0.05 = \text{Not Significant (NS)}$ ,  $P \leq 0.01 = **$ , and  $P \leq 0.001 = ***$

**Fig 4: Force test of 1% Phytagel and 1% Phytagel C plates**

Force required to penetrate a centimeter of 1% agar plates containing either Phytigel or Phytigel C as the gelling agent. Three plates for each gelling agent were prepared identically. 10 samples were taken from each plate and averaged. In a Welch's t test (unpaired two-tailed t test with unequal variance) compared with Phytigel:  $P \leq 0.0001 = ****$

Since the original Phytigel is no longer available for purchase, and Phytigel C has an adverse impact on seedling phenomics, another gelling agent, Gellan, was compared to Phytigel. Gellan was able to distinguish the subtle phenotype of *sob3-4 esc-8* through fluence-rate-response analysis (Fig 5, A and C) and was able to significantly separate *sob3-4 esc-8* from the WT (Fig 5, B and D).

# **Fig 5: Fluence rate responses of 6-day-old seedlings on 1% Phytigel and 1% Gellan plates**

**A)** Fluence rate responses of 6-day-old seedlings that have been normalized to the dark control on plates containing 1% Phytigel media. **B)** Graphical representation of 6-day-old seedlings that have been normalized to the dark control on plates containing 1% Phytigel media. **C)** Fluence rate responses of 6-day-old seedlings that have been normalized to the dark control on plates containing 1% Gellan media. **D)** Graphical representation of 6-day-old seedlings that have been normalized to the dark control on plates containing 1% Gellan media.

Standard error is shown for all data sets. In a Welch's t test (unpaired two-tailed t test with unequal variance) compared with the wild type,  $P \leq 0.0001 = ****$

Percent root penetrance on 1% Gellan plates were not negatively impacted for any of the genotypes at any light fluence-rate when compared to 1% Phytigel plates (Fig 6, A). In addition, in all conditions the percentage of root penetrance on 1% Gellan plates was higher than on 1% Phytigel plates (Fig 6, B). The root penetrance data can be explained, at least in

part by, the observation that 1% Gellan plates are softer than 1% Phytigel plates (Fig 7). This may also explain the visual difference we see between 1% Phytigel C and 1% Gellan plates (Fig 8).

**Fig 6: Average root penetrance of 6-day-old seedlings on 1% Phytigel and 1% Gellan plates**

**A)** Average root penetrance of 6-day-old WT seedlings on Phytigel and Gellan at increasing light concentrations. **B)** Average root penetrance of 6-day-old *sob3-4 esc-8* seedlings on Phytigel and Gellan at increasing light concentrations.

In a Welch's t test (unpaired two-tailed t test with unequal variance) compared with Phytigel:  $P > 0.05$  = Not Significant (NS),  $P \leq 0.05$  = \*

**Fig 7: Force test of 1% Phytigel and 1% Gellan plates**

Force required to penetrate a centimeter of 1% agar plates containing either Phytigel or Gellan as the gelling agent. Three plates for each gelling agent were prepared identically. 10 samples were taken from each plate and averaged. In a Welch's t test (unpaired two-tailed t test with unequal variance) compared with Phytigel:  $P \leq 0.0001$  = \*\*\*\*

**Fig 8: Photos of seedlings grown on 1% media at  $10 \mu\text{mol m}^{-2}\text{s}^{-1}$  for six days**

**A)** 6-day-old seedlings grown on 1% Gellan at  $10 \mu\text{mol m}^{-2}\text{s}^{-1}$ . **B)** 6-day-old seedlings grown on 1% Phytigel C at  $10 \mu\text{mol m}^{-2}\text{s}^{-1}$ .

Since Phytigel is no longer available and Phytigel C is not a viable alternative, a replacement gelling agent needed to be identified. Since 1% Gellan has been shown to reproduce previously published results (Figs 5 and 6), we tested various concentrations to determine a new standard for the lab. 0.6% Gellan plates were able to reproduce the same previously published results (Figs 9 and 10). We replicated the 0.6% experiment with Phytigel C



(Fig 11). Even at this lower concentration, Phytigel C was not able to distinguish the *sob3-4 esc-8* phenotype from the WT phenotype.

**Fig 9: Photos of 6-day-old seedlings grown on media at 10  $\mu\text{mol m}^{-2}\text{s}^{-1}$**

**A)** 6-day-old seedlings grown on 0.6% Gellan at 10  $\mu\text{mol m}^{-2}\text{s}^{-1}$ . **B)** 6-day-old seedlings grown on 1% Gellan at 10  $\mu\text{mol m}^{-2}\text{s}^{-1}$ .

**Fig 10: Fluence rate responses of 6-day-old seedlings plates containing 0.6% Gellan media**

**A)** Fluence rate responses of 6-day-old seedlings that have been normalized to the dark control on plates containing 0.6% Gellan media. **B)** Graphical representation of 6-day-old seedlings that have been normalized to the dark control on plates containing 0.6% Gellan media. Standard error is shown for all data sets. In a Welch's t test (unpaired two-tailed t test with unequal variance) compared with the wild type,  $P \leq 0.001 = ***$  and  $P \leq 0.0001 = ****$

**Fig 11: Fluence rate responses of 6-day-old seedlings on plates containing 0.6% Phytigel C media**

**A)** Fluence rate responses of 6-day-old seedlings that have been normalized to the dark control on plates containing 0.6% Phytigel C media. **B)** Graphical representation of 6-day-old seedlings that have been normalized to the dark control on plates containing 0.6% Phytigel C media. Standard error is shown for all data sets. In a Welch's t test (unpaired two-tailed t test with unequal variance) compared with the wild type,  $P > 0.05 = \text{Not Significant (NS)}$ ,  $P \leq 0.0001 = ****$

**Discussion**

Seedling phenomics is an important area of research that relies on the reproducibility of agar plates. This is especially important when seedlings display subtle phenotypes, as in the case of the *A. thaliana* missense allele, *phyB-4*, and the double mutant, *sob3-4 esc-8*. In our study, we aimed to uncover roles that different gelling agents could be playing in *A. thaliana* seedling growth and development. Phytigel produced in America has been used for several studies involving the characterization of subtle seedling phenotypes (3,9,11). Phytigel produced in China does not replicate these results in at least three distinct ways: fluence-rate-response analyses, root penetrance analyses, and hardness assays.

The disparity in hardness between the 1% Phytigel and 1% Phytigel C plates may explain the difference we see in seedling growth. For example, the hardness of the 1% Phytigel C plates may not be impacting the ability of the seeds to germinate, but it may be impacting the ability of the roots to penetrate the agar and allow for proper growth. This may explain why we do not see an impact on germination rates for *sob3-4 esc-8*, but we saw a significant impact on the ability of the *sob3-4 esc-8* roots to penetrate. We suspect that the hardness of the plate may be due to a chemical change in the Phytigel C media when exposed to light. The change in seedling growth and development could also be due to a change in water potential within the media. Further testing is needed to determine the cause of the increased hardness of the Phytigel C plates.

Since Phytigel C was not able to give reproducible results, we tested another gelling agent, Gellan, to determine if it was a suitable replacement for Phytigel. We suspected that the cause for similar root penetrance between 1% Gellan and 1% Phytigel plates may be due to likeness in hardness. However, we found that 1% Gellan plates are significantly less hard than

1% Phytigel plates. Chemical and/or osmotic experimentation would possibly clarify the differences in hardness that is seen between the three different gelling agents.

After the aforementioned experiments, the Neff lab decided to replace Phytigel with Gellan for phenotypic experimentation on *A. thaliana* seedlings. This was a necessary replacement, as seedling phenomics were halted in the Neff lab without a reliable gelling agent. Since the 1% protocol had been established with Phytigel, we tested different concentrations of Gellan to establish a new standard. We found that 0.6% Gellan plates gave more uniform visual results than 1%, reproduced previously published results, and is a more cost-effective option. Therefore, the Neff lab has replaced 1% Phytigel with 0.6% Gellan for phenotypic analysis of *v* seedlings.

This study highlights key development differences of *A. thaliana* seedlings on different gelling agents. It doesn't, however, explore the chemical or physical differences that may be causing the changes in growth for plants germinated on Phytigel compared to Phytigel C. Though this information may be of interest to those involved in the production of gelling agents, the main purpose of this study it to report the problems that we have encountered while also providing a viable replacement for seedling morphometric analysis.

## Conclusion

Three gelling agents, Phytigel (no longer commercially available), Phytigel C, and Gellan, were investigated based on their ability to reproduce the subtle phenotype of the *sob3-4 esc-8* double mutant. Fluence-rate-response analysis of 1% Phytigel C plates failed to replicate the *sob3-4 esc-8* subtle seedling phenotype seen on 1% Phytigel. Furthermore, root

penetrance analysis showed a significant difference in root penetration between *sob3-4 esc-8* seedlings grown on 1% Phytigel and 1% Phytigel C. Finally, it was found that 1% Phytigel C was significantly harder than 1% Phytigel, which may be causing decreased *sob3-4 esc-8* root penetrance, as well as affecting seedling growth and development.

As a substitute for Phytigel C, 1% Gellan was able to reproduce the subtle phenotype of the *sob3-4 esc-8* double mutant. Furthermore, there was no significant difference in root penetration of the WT or *sob3-4 esc-8* seedlings between 1% Phytigel and 1% Gellan. It was also found that 1% Gellan plates are significantly softer than the 1% Phytigel plates. These observations suggest that Gellan is a suitable replacement for Phytigel. In order to establish a new standard for the lab, we tested different percentages of Gellan media. We found that 0.6% Gellan also reproduces previously published phenotypes and is more cost effective.

The information provided in this manuscript is beneficial to the scientific community as whole, specifically phenomics labs, as it details key problematic differences between gelling agents that should be performing identically (Phytigel and Phytigel C). We also provide labs with additional information on an gelling agent, Gellan, which can replace the use of the no-longer commercially available Phytigel. These data will help to promote consistency of methodologies for better integration of data from different laboratories.

## Methods

### Agar Plates

50mL agarose plates were made with media containing one-half-strength Linsmaier and Skoog modified basal media, 1.5% sucrose (m/v), and the appropriate amount (m/v) of gelling agent.

The gelling agents used in this study are: Phytigel (Sigma), Phytigel C (Sigma), and Gellan (PhytoTechnology Laboratories). Experiments were conducted on agar plates containing 0.6% or 1% of these gelling agents.

## Experimental Design

15 seeds with known, published phenotypes (WT, *sob3-4 esc-8*, *sob3-6*, and *SOB3-D*) were hand-plated onto evenly divided sectors on each plate. These seeds had been previously surface-sterilized, as described below, and were used for up to six weeks post-sterilization. The plates were kept in the dark at 4° Celsius for three days to synchronize germination. Post cold and dark treatment, the plates underwent a 12-hour red-light treatment in a growth chamber at 25° Celsius. After this red-light treatment, one plate from each gelling agent group was subjected to one of these four light treatments for a total of six days: dark, 10  $\mu\text{mol m}^{-2}\text{s}^{-1}$ , 60  $\mu\text{mol m}^{-2}\text{s}^{-1}$ , and 100  $\mu\text{mol m}^{-2}\text{s}^{-1}$ . At the end of six days, each seedling was analyzed for root penetrance and germination. Root penetrance and germination were recorded separately as binary results: 1 for yes it penetrated/germinated and 0 for no it did not penetrate/germinate. For example, a seed that germinated, but did not penetrate the agar was recorded as 1/0. After these data were recorded, the seedlings were transferred to transparencies. The transparencies were scanned to the computer and the hypocotyl length of each seedling was measured using ImageJ Software, and is described in detail below. To account for differences in timing of germination, seedling measurements were normalized to the average hypocotyl length of each specific genotype grown in the dark. Eleven replicates were conducted for each light treatment and gelling agent combination at 1% concentration. Seven replicates were conducted for each light treatment and gelling agent combination at 0.6% concentration.

## **Seed Sterilization**

For sterilization, seeds were placed in microcentrifuge tubes and covered with 75% alcohol containing 0.5% Triton X-100 (v/v) and placed on a shaker for 15 minutes. The liquid was pipetted off and the seeds were covered with 95% alcohol containing 0.5% Triton X-100 (v/v) and shaken for 10 minutes. The liquid was pipetted off and the seeds were covered with 95% alcohol (v/v) and shaken for five minutes. The liquid was pipetting off and the seeds were placed on sterilized filter paper and left to dry in a laminar airflow hood.

## **Chamber setup**

The light chamber used is E30B (Percival Scientific, Inc.). The different light intensities were achieved through mesh screens. The light intensities were measured before experimentation using a light photometer. Periodic measurements were taken to ensure the light intensities were not fluctuating.

## **Measuring Hypocotyl Length via NIH ImageJ Software**

The transparencies were digitized with a flatbed scanner at 720 dpi. The transparencies included a ruler for measuring a 1mm length to set the parameters for measurements in ImageJ (The NIH). A length of 1mm was established in pixels for each image. The hypocotyls were measured from the top of hypocotyl to the beginning of the roots using the segmented line tool. The same researcher measured all of hypocotyls to ensure no discrepancies would occur in measuring the hypocotyls. The measurements were transferred to an Excel spreadsheet for analysis.

## **Hardness Testing via FTA Probe**

A fruit texture analyzer probe (GS-14 Fruit Texture Analyzer, GÜSS Instruments, South Africa) was used to test the force required to penetrate 1cm of agar. Ten locations were selected on each plate and tested. Three plates were made at 1% for Phytagel, Phytagel C, and Gellan. The values for like plates were averaged.

### **Analysis of Data and Statistics**

Standard error was conducted on all data sets and are included as error bars where appropriate. Welch's t test (unpaired two-tailed t test with unequal variance) was also conducted where appropriate. P values are included as follows:  $P > 0.05$  = Not Significant (NS),  $P \leq 0.01$  = \*\*,  $P \leq 0.001$  = \*\*\*, and  $P \leq 0.0001$  = \*\*\*\*.

### **Acknowledgments**

The Smertenko lab at Washington State University provided the original Phytagel needed for this experiment.

Seanna Hewitt of the Dhingra lab at Washington State University provided the Fruit Texture Analyzer (FTA) probe used to test the hardness of the plates.

# Reference List

- Millipore Sigma. Gelling Agents – Plant Tissue Culture Protocol [Internet]. Sigma Aldrich. 2019 [cited 10 November 2019]. Available from: <https://www.sigmaaldrich.com/technical-documents/protocols/biology/gelling-agents.html>
- PhytoTechnology Laboratories. Product Information Sheet [Internet]. PhytoTechnology Laboratories. 2013 [cited 10 November 2019]. Available from: <https://phytotechlab.com/mwdownloads/download/link/id/2808/>
- Neff, M.M., and Chory, J. Genetic interactions between phytochrome A, phytochrome B, and cryptochrome 1 during Arabidopsis development. *Plant Physiology*. 1999;118: 27–36
- Weigel, D., Ahn, J.H., Blazquez, M.A., Borevitz, J.O., Christensen, S.K., Fankhauser, C., Ferrandiz, C., Kardailsky, I., Malancharuvil, E.J., Neff, M.M., *et al.* Activation tagging in Arabidopsis. *Plant physiol*. 2000; 122 (4) 1003-1014
- Ward, J. M., Cufr, C. A., Denzel, M. A., Neff, M.M. The Dof Transcription factor OBP3 Modulates Phytochrome and Cryptochrome Signaling in Arabidopsis. *Plant Cell*. 2005; 17(2):475–485
- Turk, E.M., Fujioka, S., Seto, H., Shimada, Y., Takatsuto, S., Yoshida, S., Wang, H., Torres, Q. I., Ward, J.M., Murthy, G., Zhang, J., Walker, J. C., Neff, M.M. BAS1 and SOB7 act redundantly to modulate Arabidopsis photomorphogenesis via unique brassinosteroid inactivation mechanisms. *Plant J*. 2005;42(1):23-34
- Ward J.M., Smith A.M., Shah P.K., Gallanti S.E., Yi H., Demianski A.J., van der Graaff E., Keller B., Neff, M.M. A New Role for the AP2 Transcription Factor, LEP, in Gibberellin-Induced Germination is Revealed by the Mis-Expression of a Homologous Gene, *SOB2/DRN-like*. *Plant Cell*. 2006;18:29–39
- Zhang J., Wrage E.L., Vankova R., Malbeck J., and Neff ,M.M. Overexpression of *SOB5* suggests the involvement of a novel plant protein in cytokinin-mediated development. *Plant J*. 2006;46:834-848
- Street, I.H., Shah, P.K., Smith, A.M., Avery, N., and Neff, M.M. The AT-hook-containing proteins SOB3/AHL29 and ESC/AHL27 are negative modulators of hypocotyl growth in Arabidopsis. *The Plant J*: 2008;54(1):1-14
- Zhao, J., Favero, D.S., Qiu, J., Roalson, E.H., and Neff, M.M. Insights into the evolution and diversification of the AT-hook Motif Nuclear Localized gene family in land plants. *BMC Plant Biol*. 2013;14:14:266



Favero, D. S., Jacques, C. N., Iwase, A., Le, K. N., Zhao, J., Sugimoto, K., & Neff, M. M.  
 SUPPRESSOR OF PHYTOCHROME B4-#3 Represses Genes Associated with Auxin Signaling to  
 Modulate Hypocotyl Growth. *Plant Physiol.* 2016;171(4):2701-2716

Peng, H., Zhao, J., and Neff, M.M. ATAF2 integrates Arabidopsis brassinosteroid inactivation and  
 seedling photomorphogenesis. *Development.* 2015;142:4129-4138

**S1 Text: Germination rates on 1% Phytagel and 1% Phytagel C media**  
**A)** Germination rates of WT, *sob3-6*, *SOB3-D*, and *sob3-4 esc-8* at 10  $\mu\text{mol m}^{-2}\text{s}^{-1}$  on 1% Phytagel  
 and 1% Phytagel C plates. **B)** Germination rates of WT, *sob3-6*, *SOB3-D*, and *sob3-4 esc-8* at 60  
 $\mu\text{mol m}^{-2}\text{s}^{-1}$  on 1% Phytagel and Phytagel C plates. **C)** Germination rates of WT, *sob3-6*, *SOB3-D*,  
 and *sob3-4 esc-8* at 10  $\mu\text{mol m}^{-2}\text{s}^{-1}$  on 1% Phytagel and Phytagel C plates.  
 Standard error is shown for all data sets. In a Welch's t test (unpaired two-tailed t test with  
 unequal variance) compared with the wild type,  $P > 0.05$  = Not Significant (NS).

**A**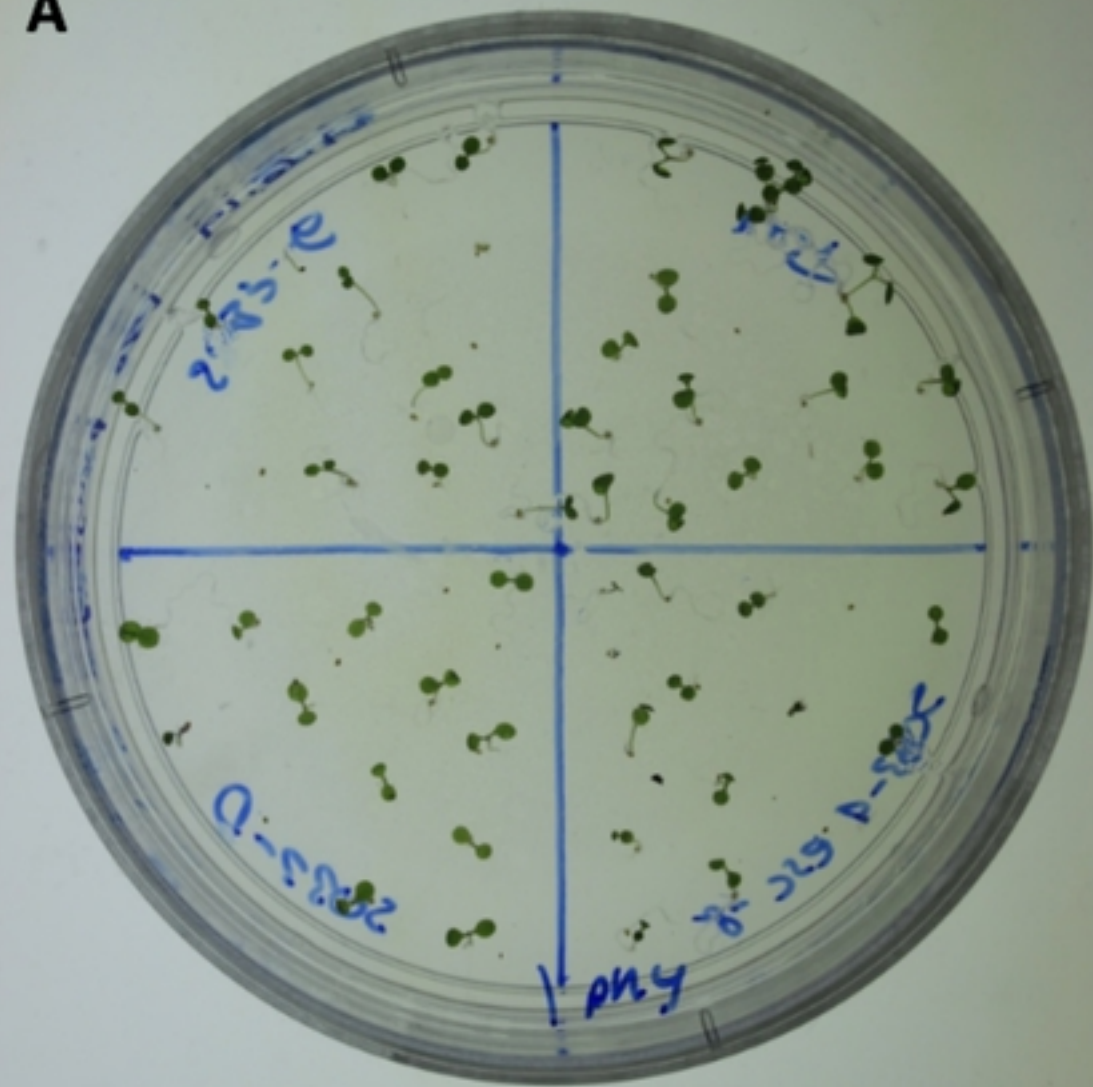**B**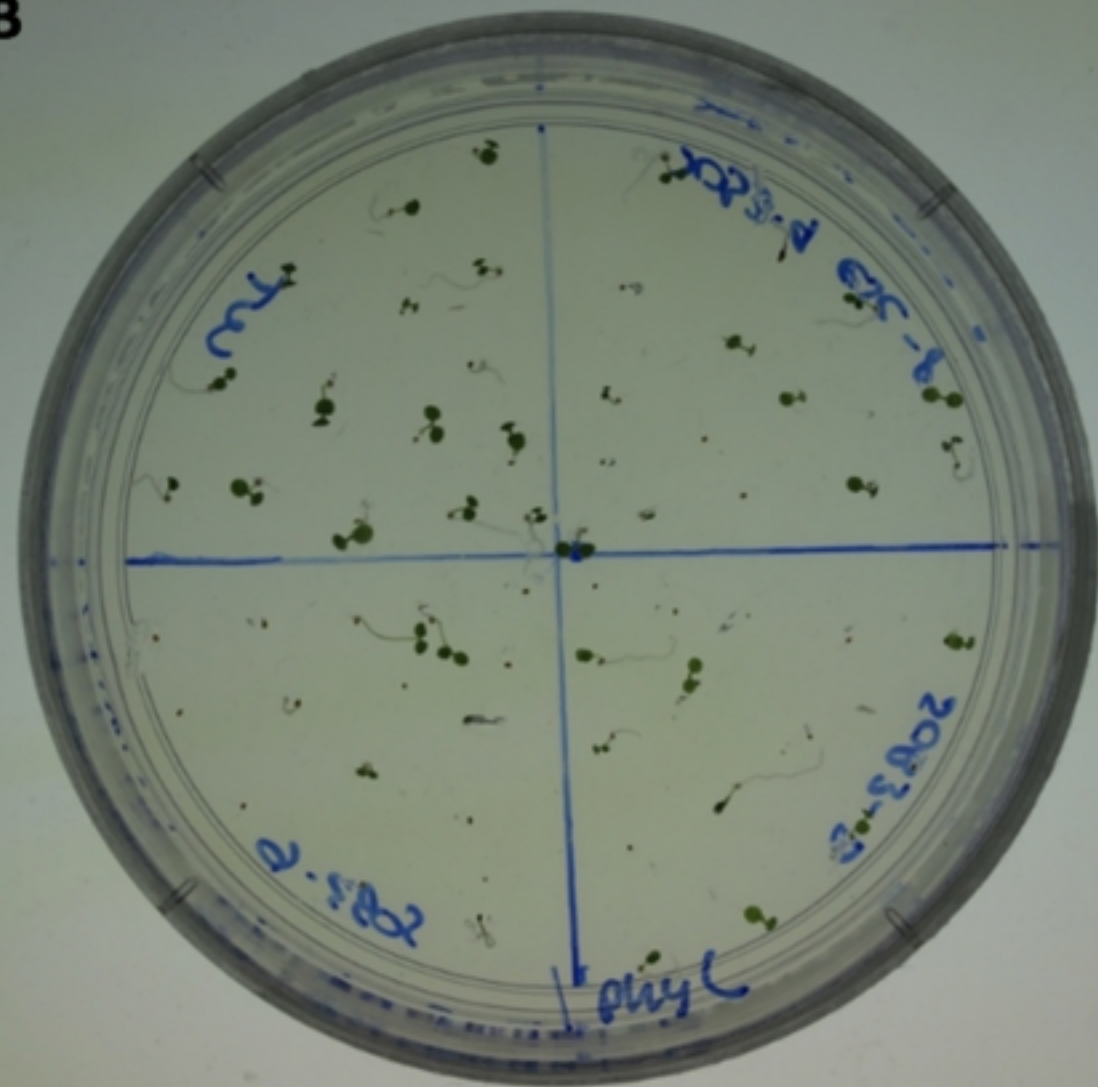

Figure 1

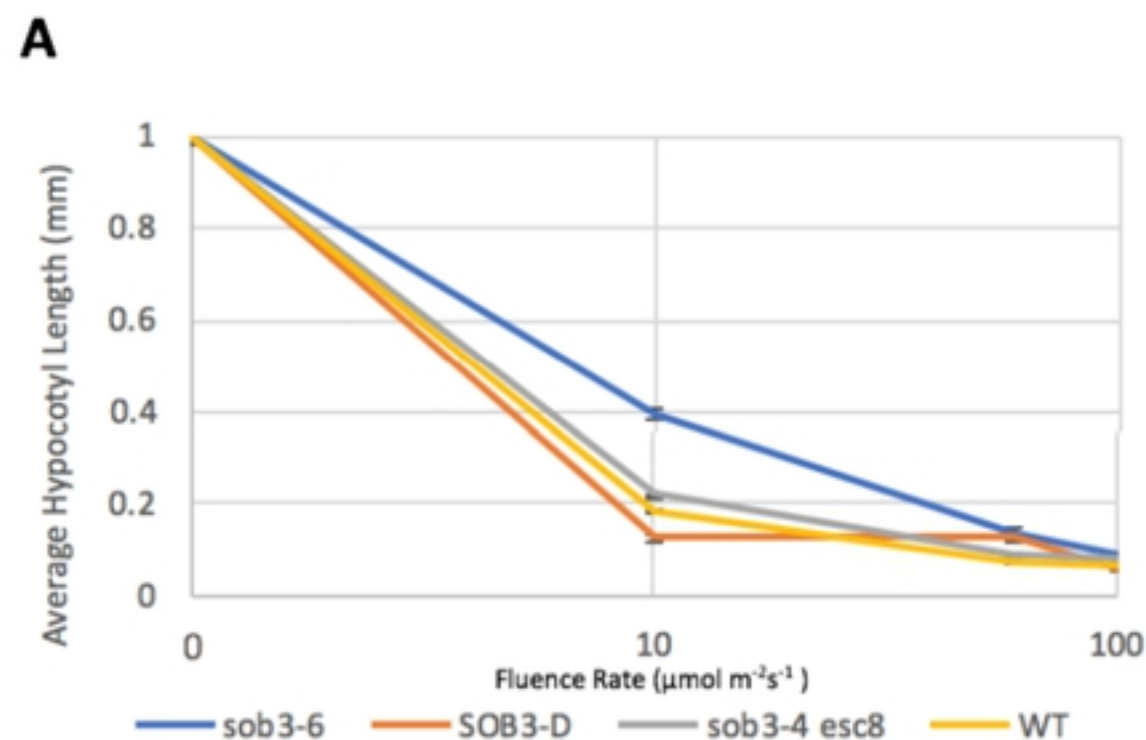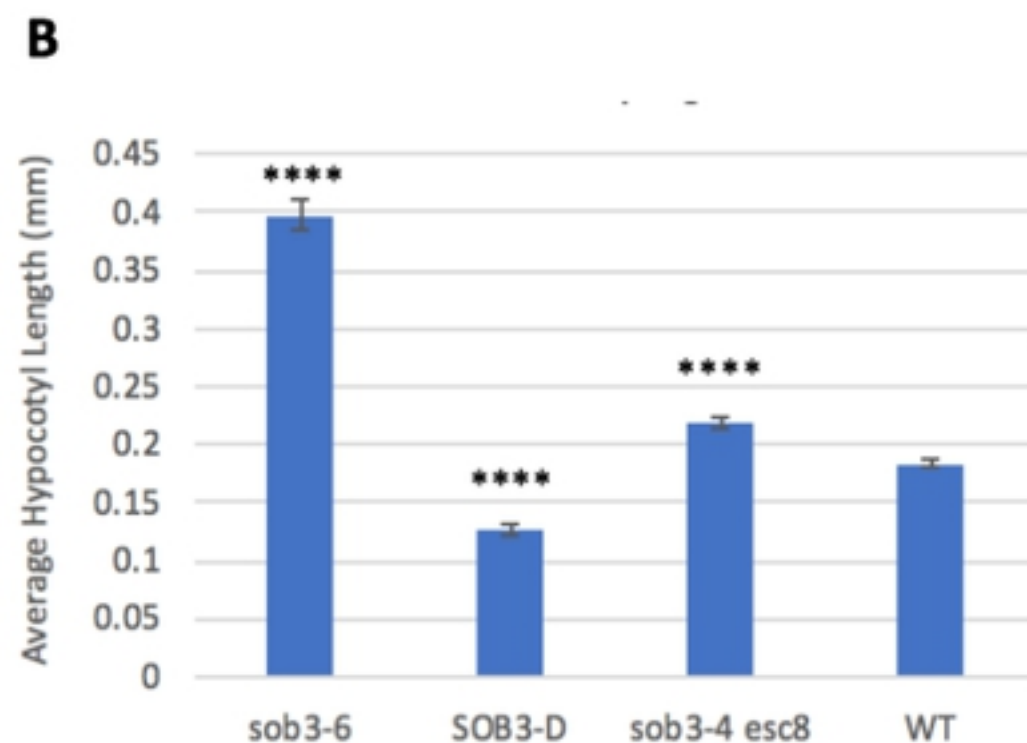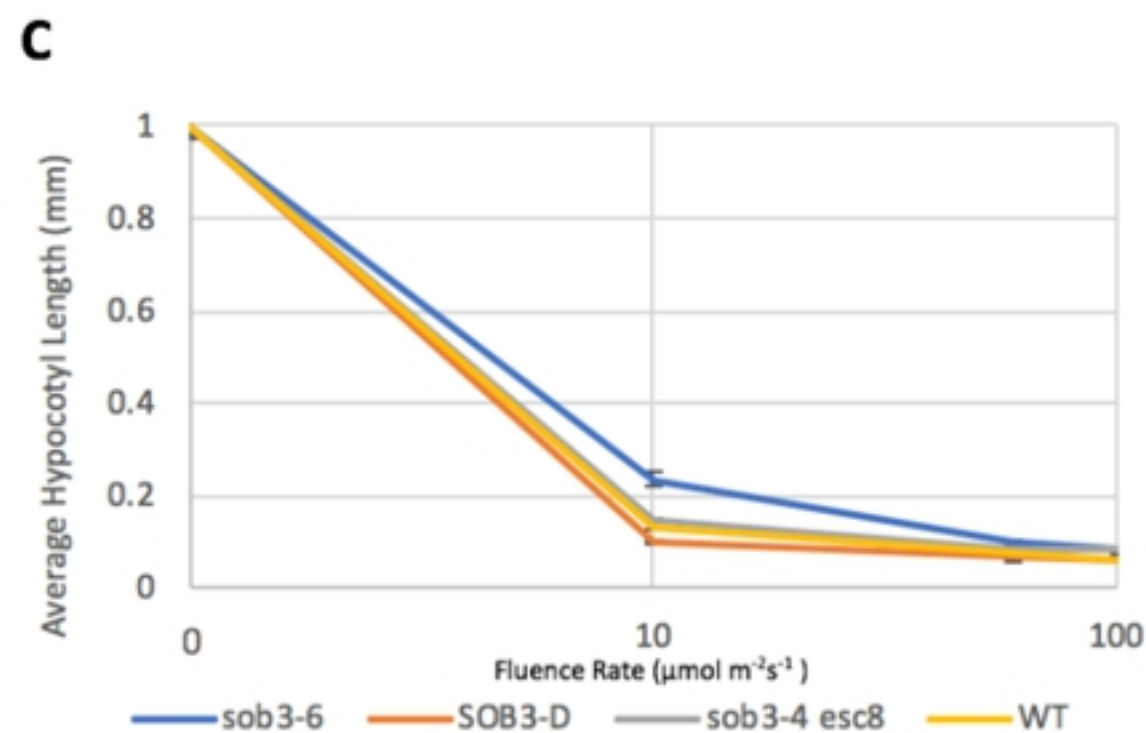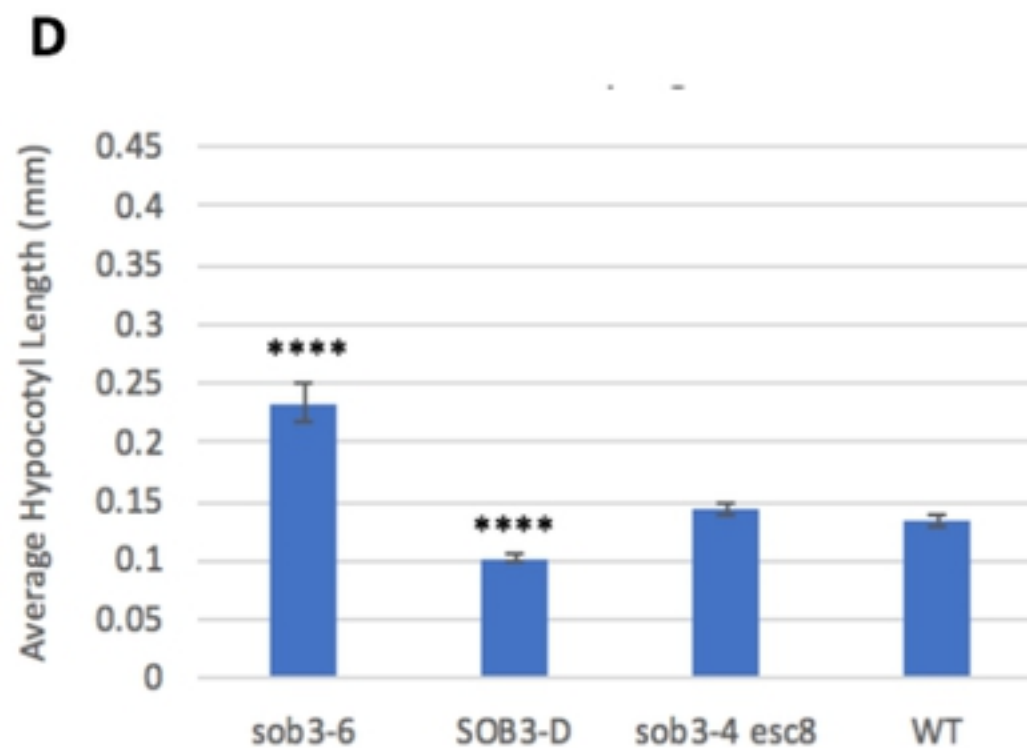

Figure 2

**A**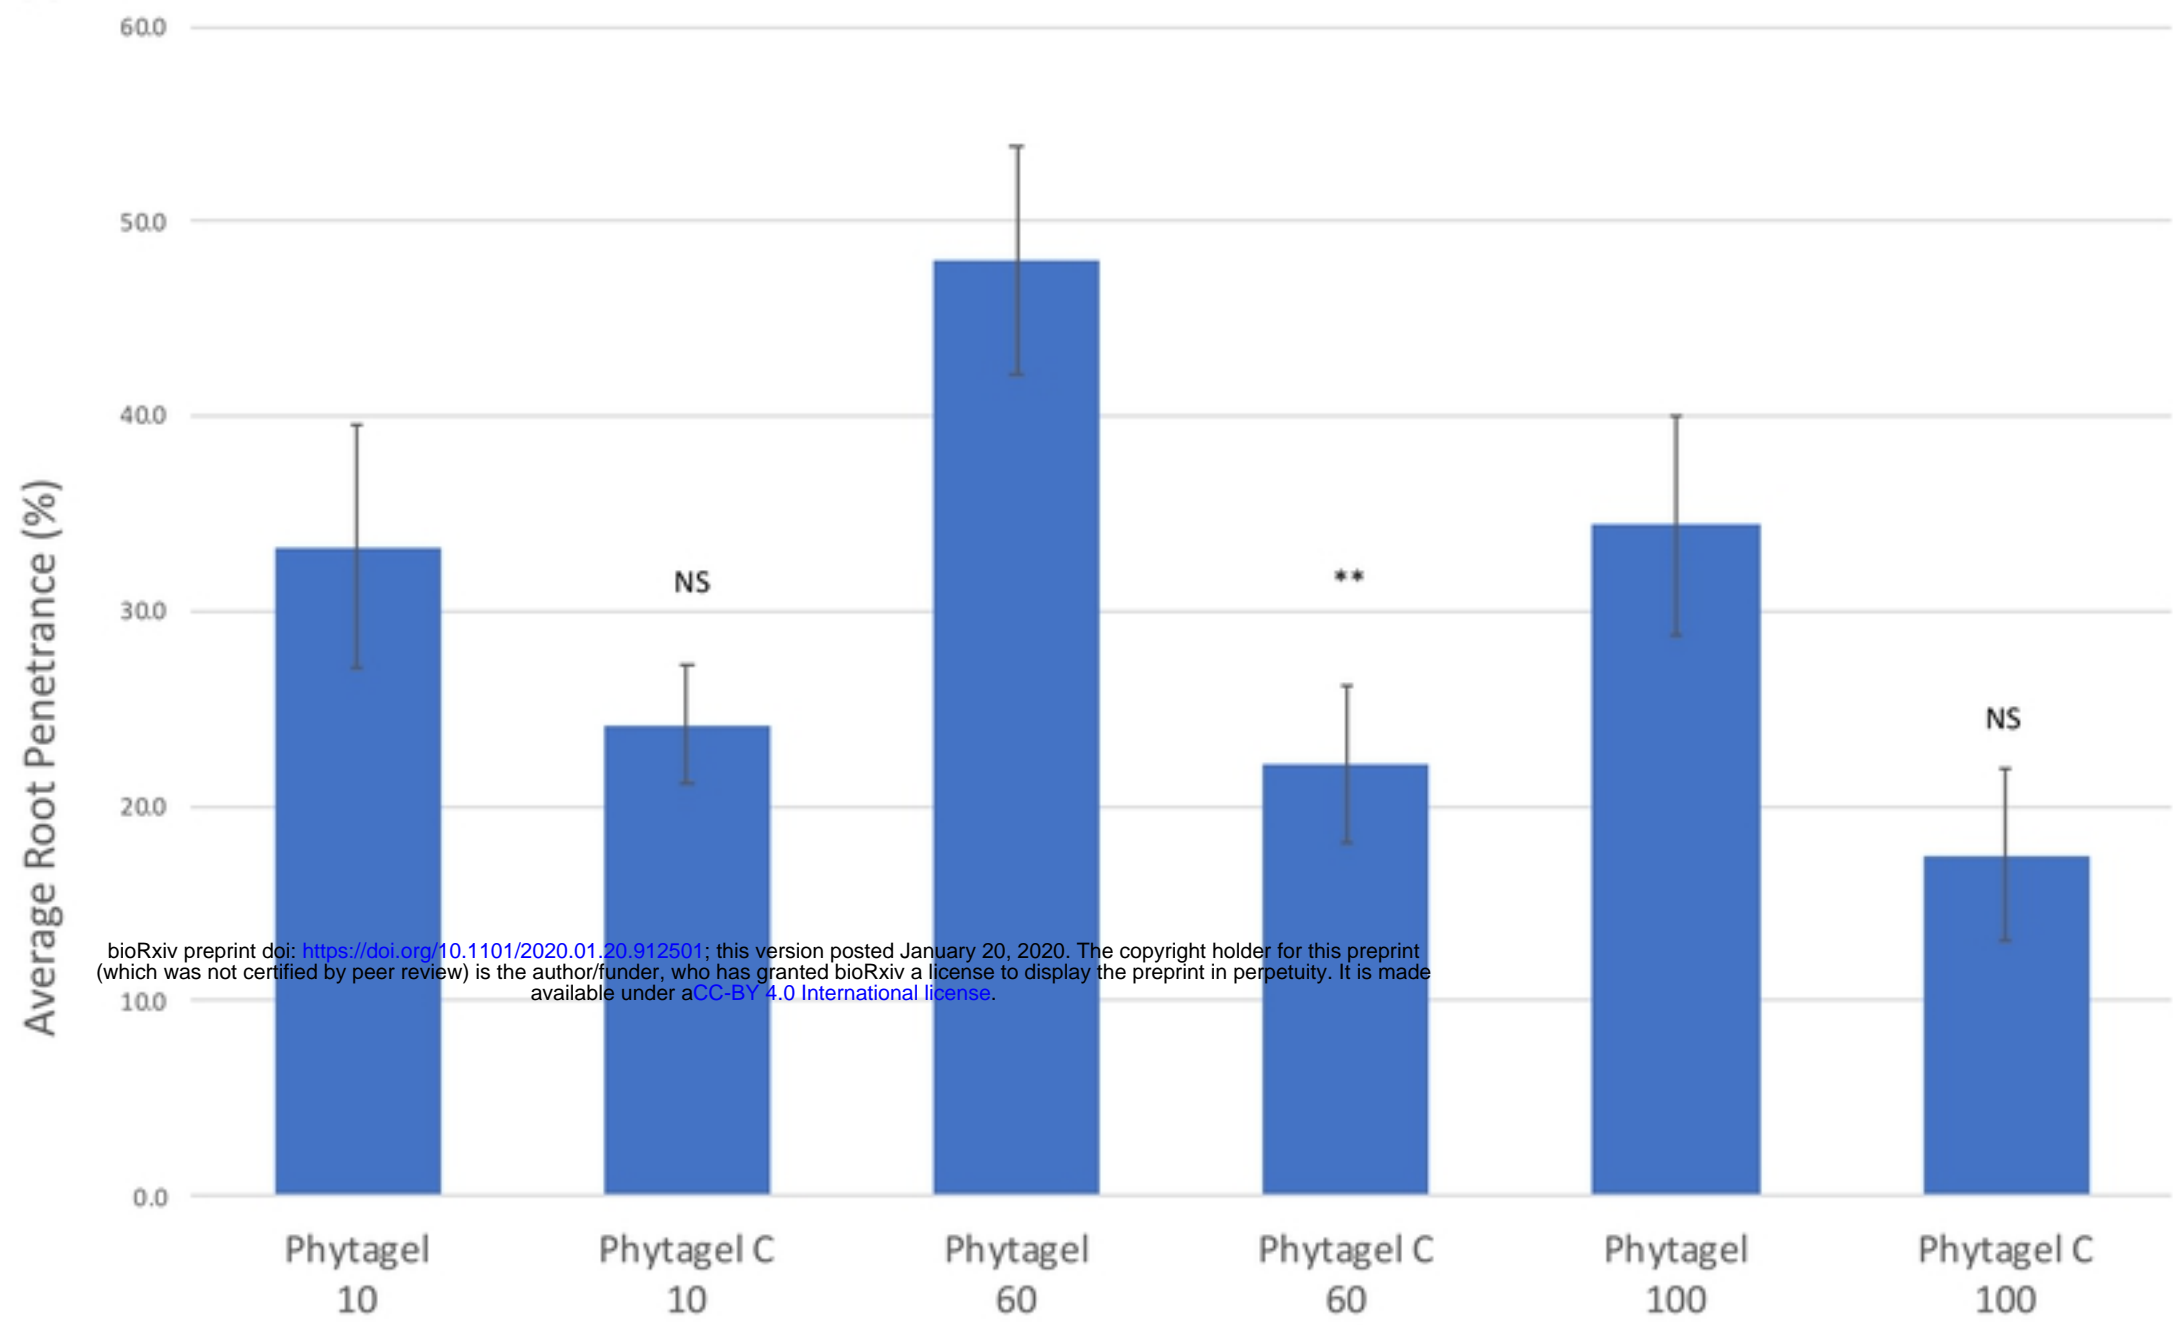**B**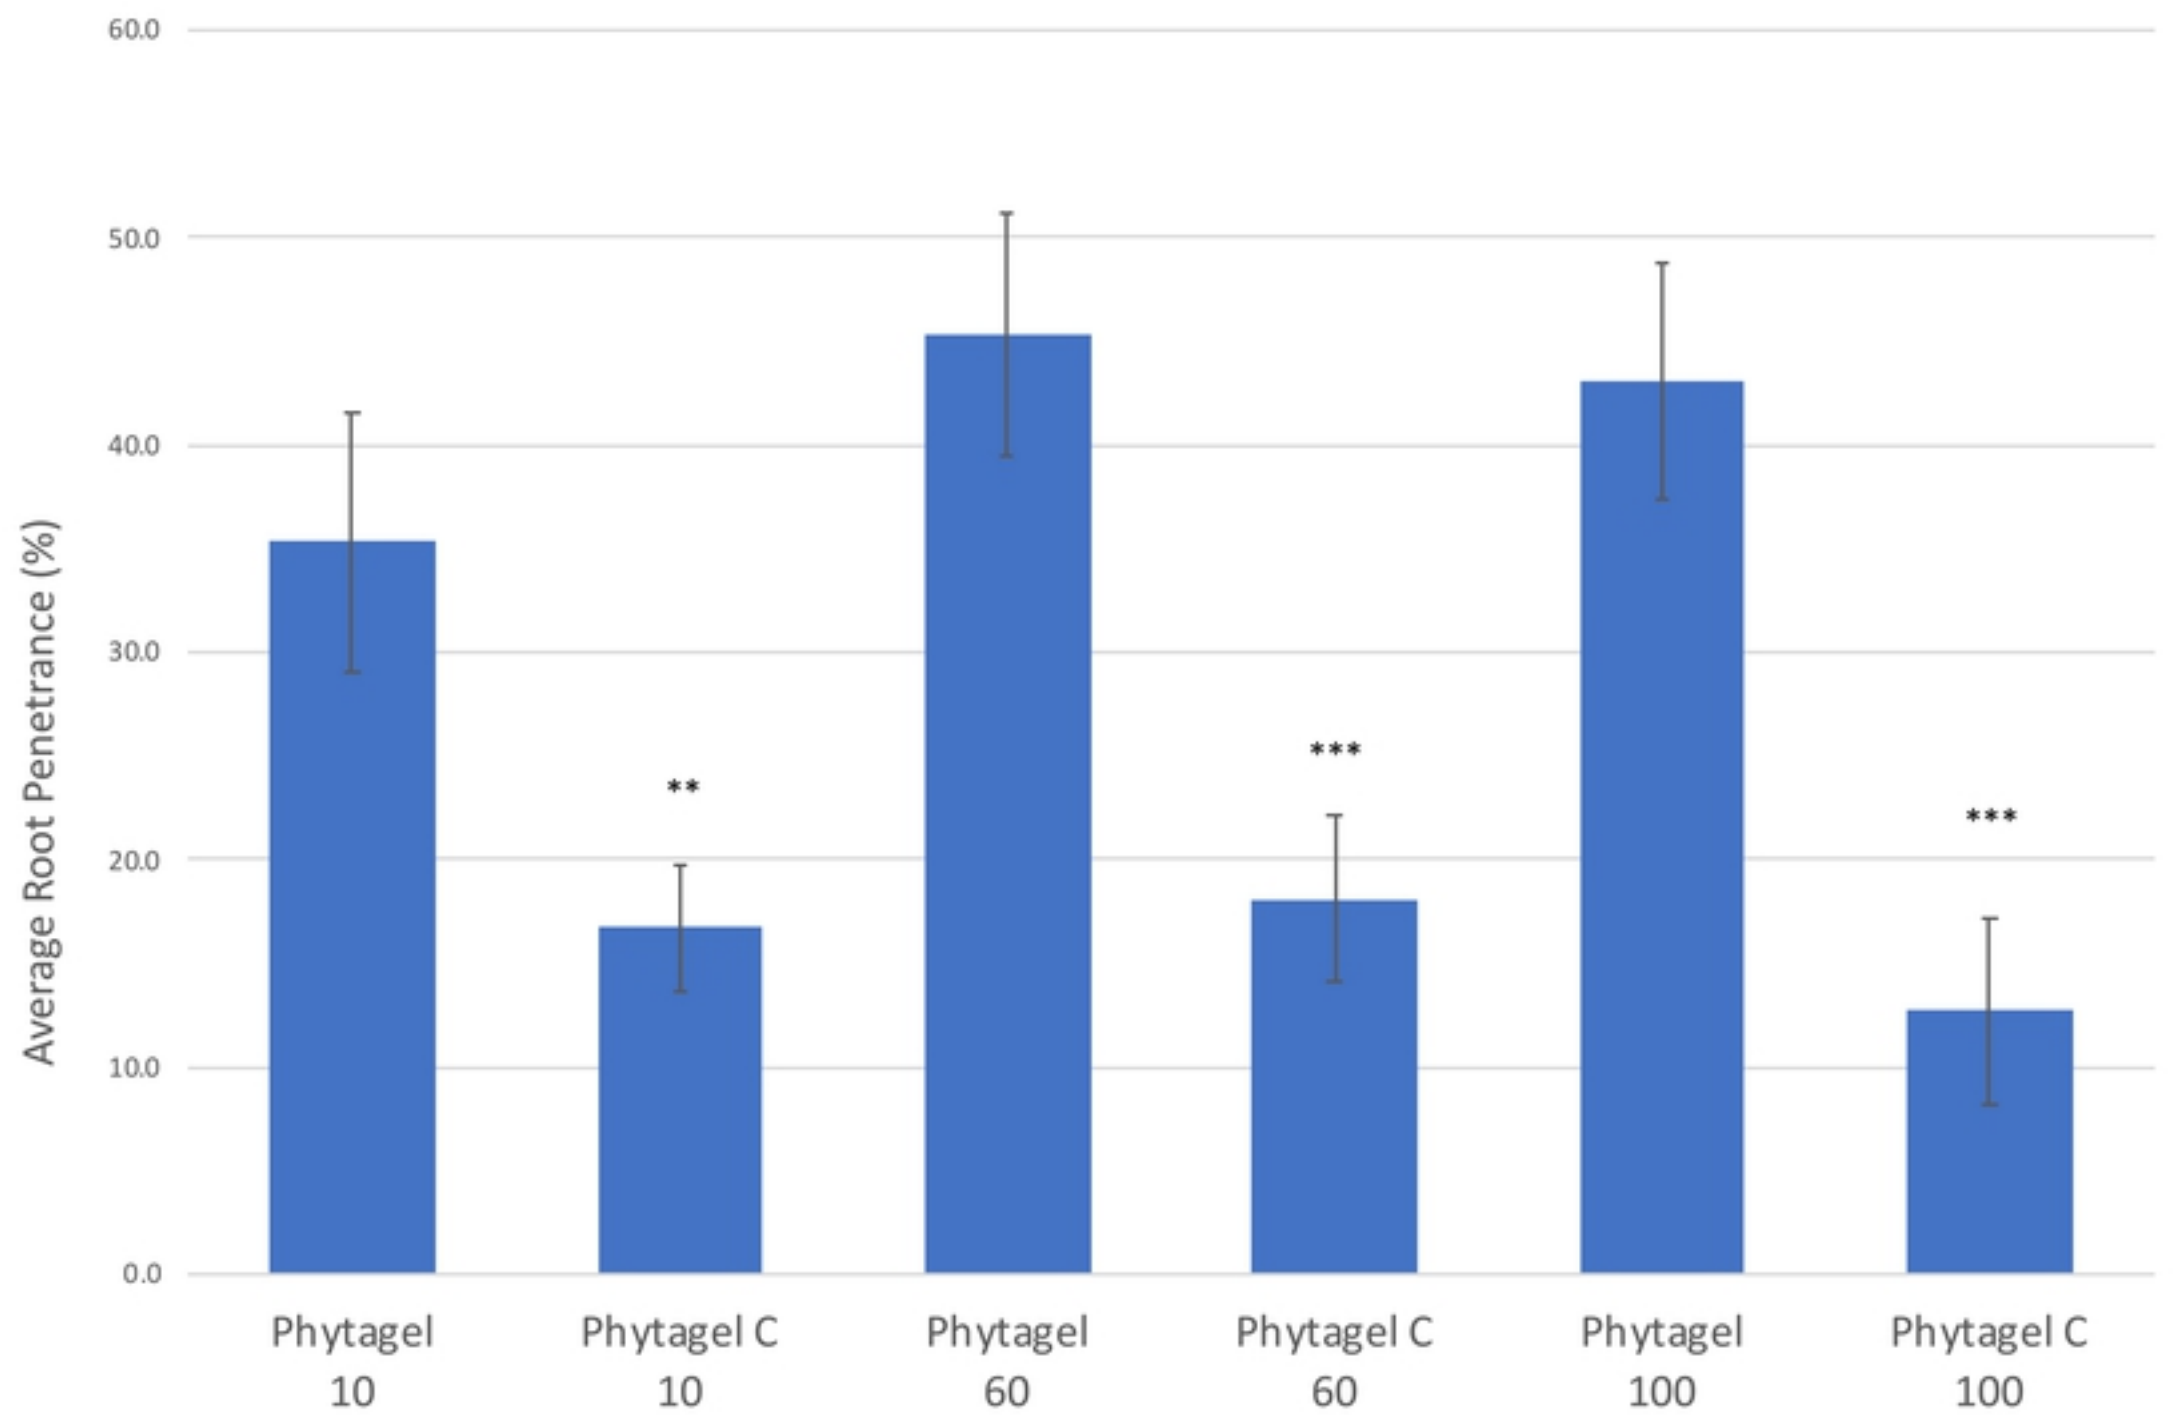**Figure 3**

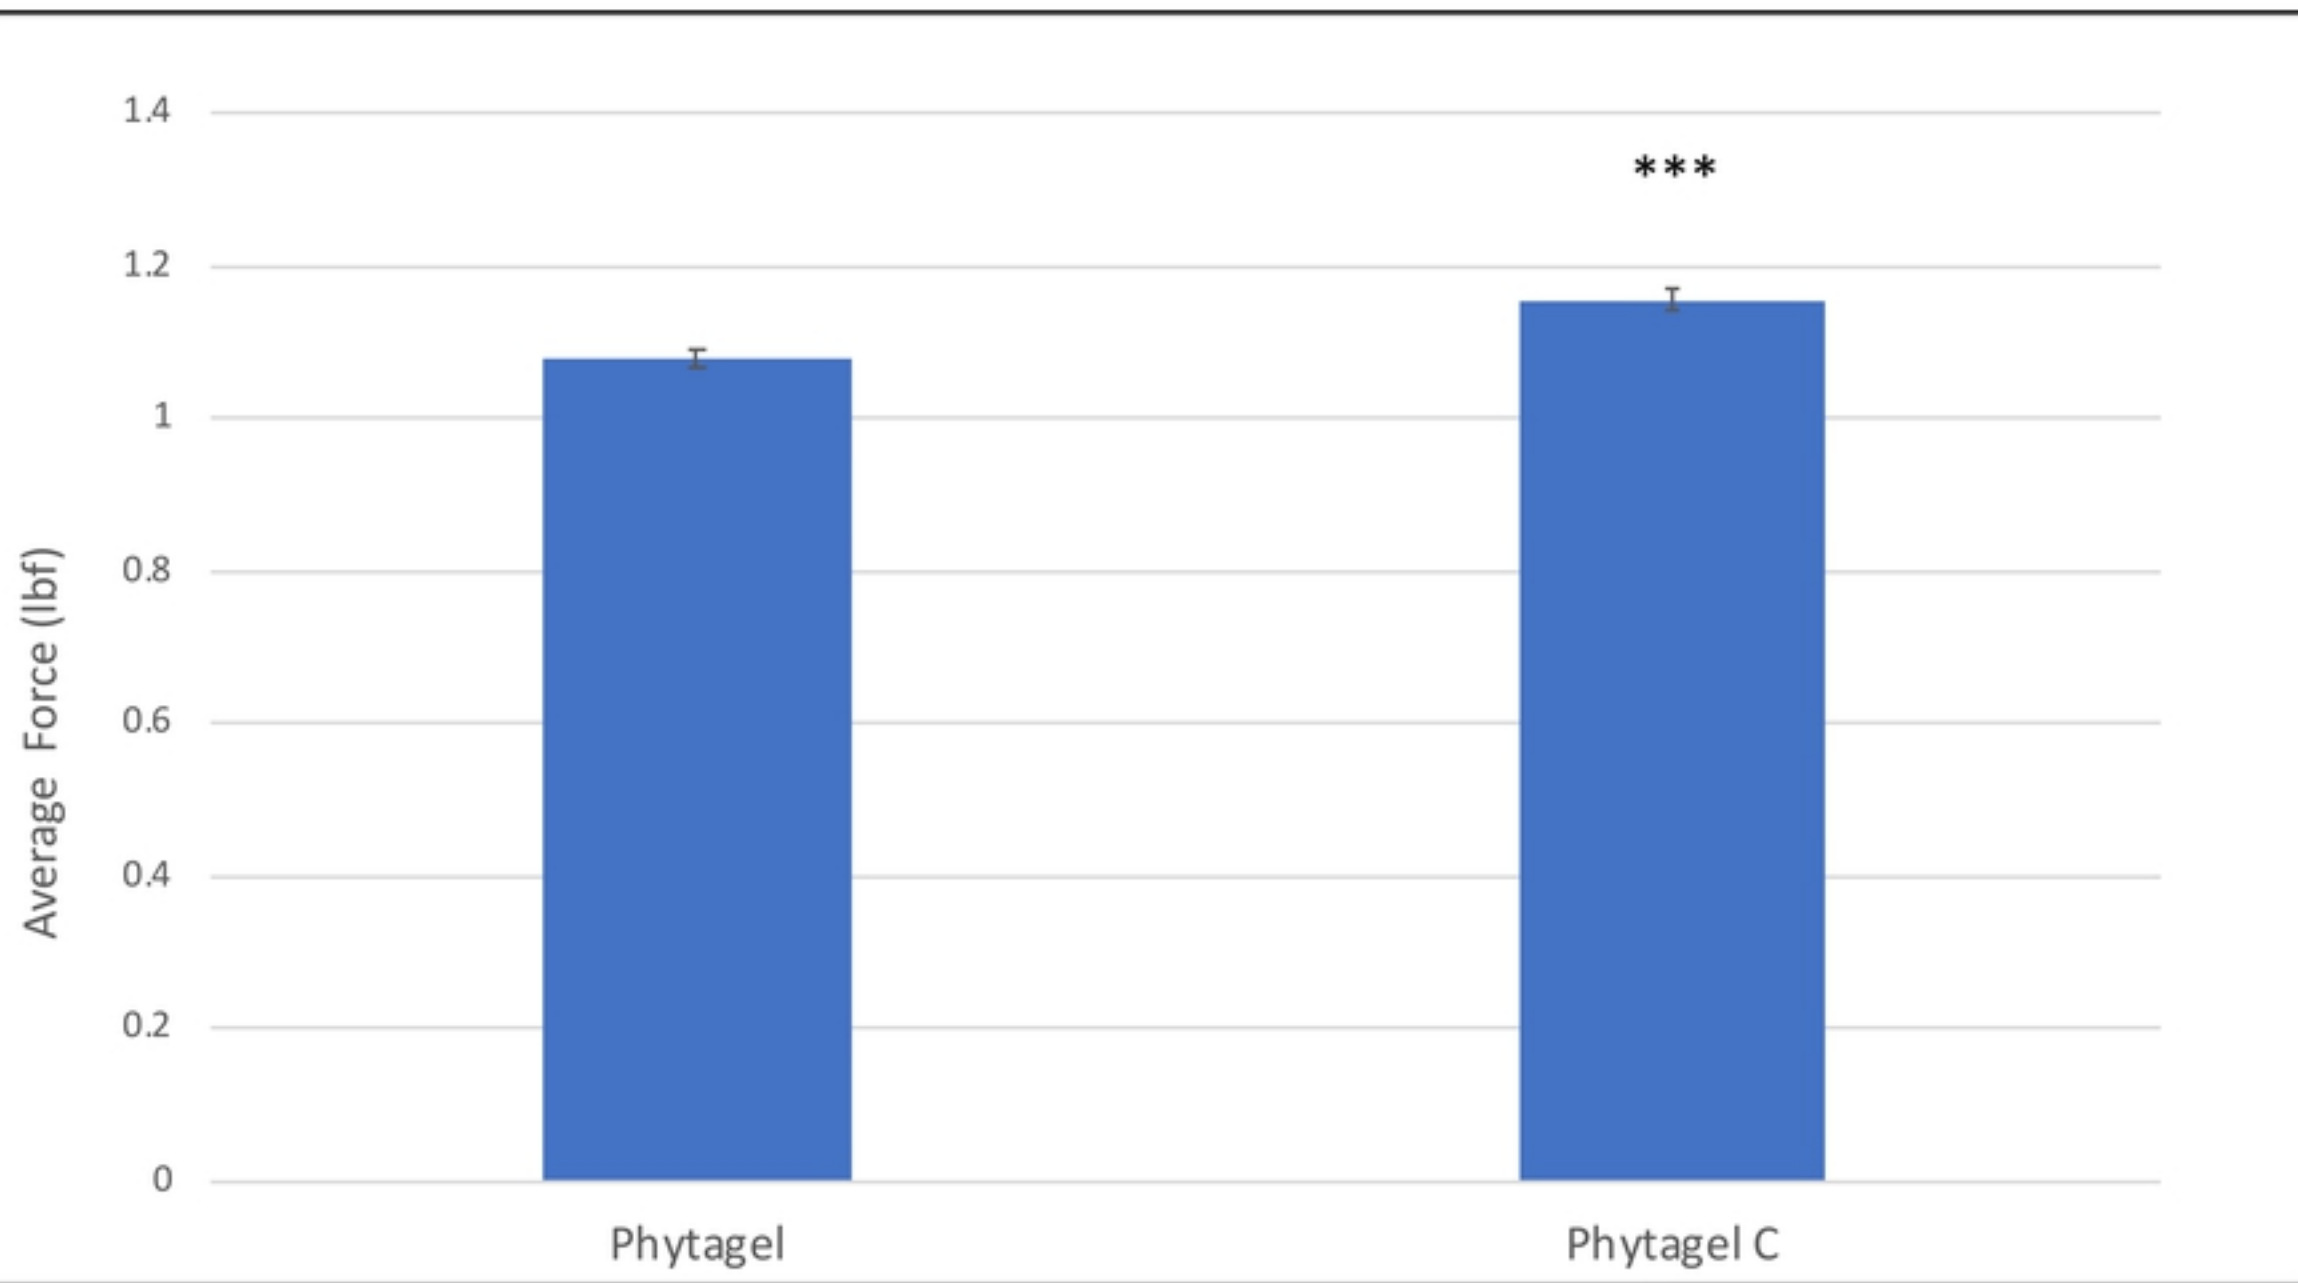

Figure 4

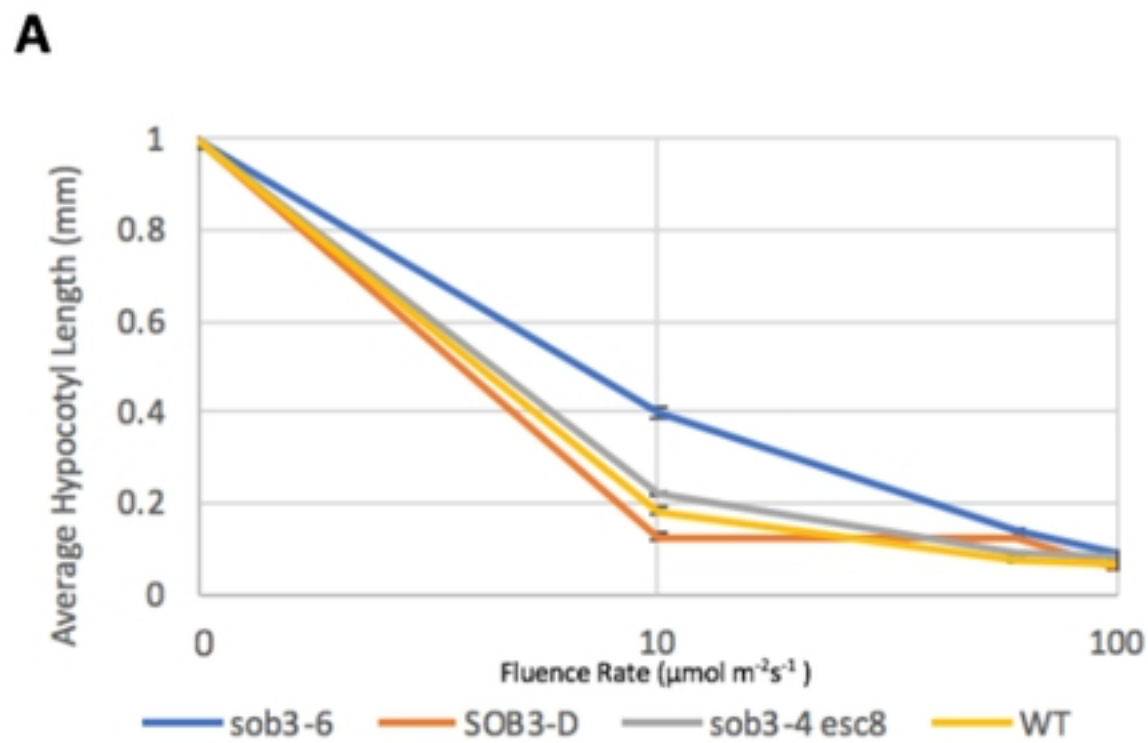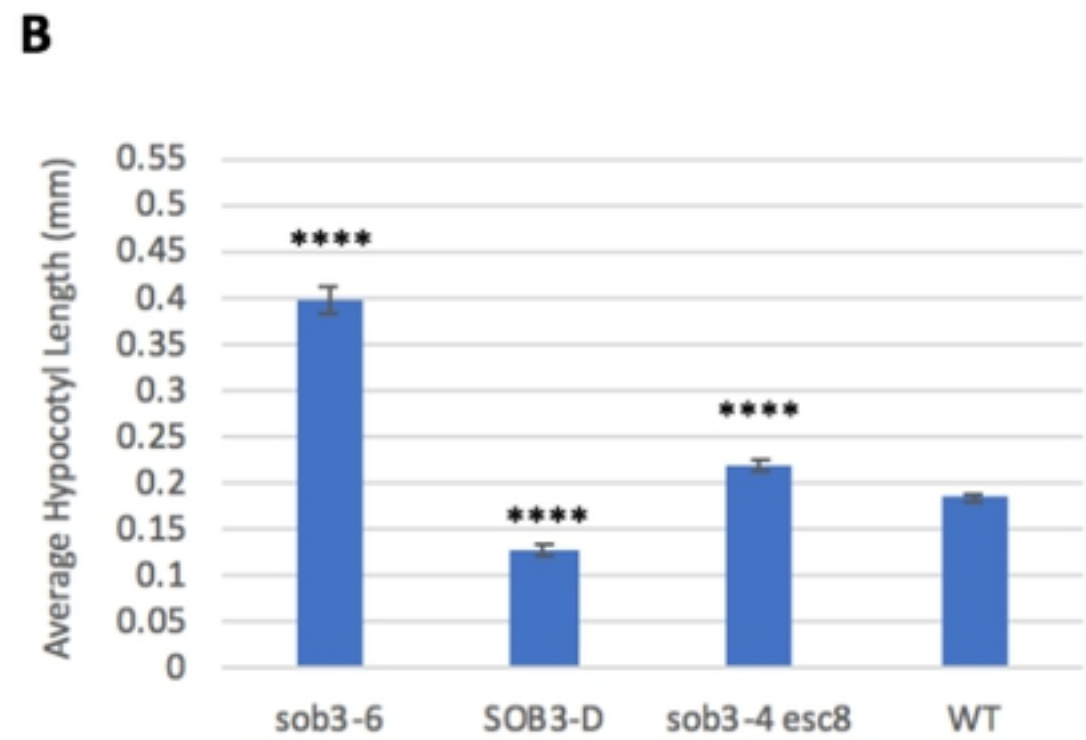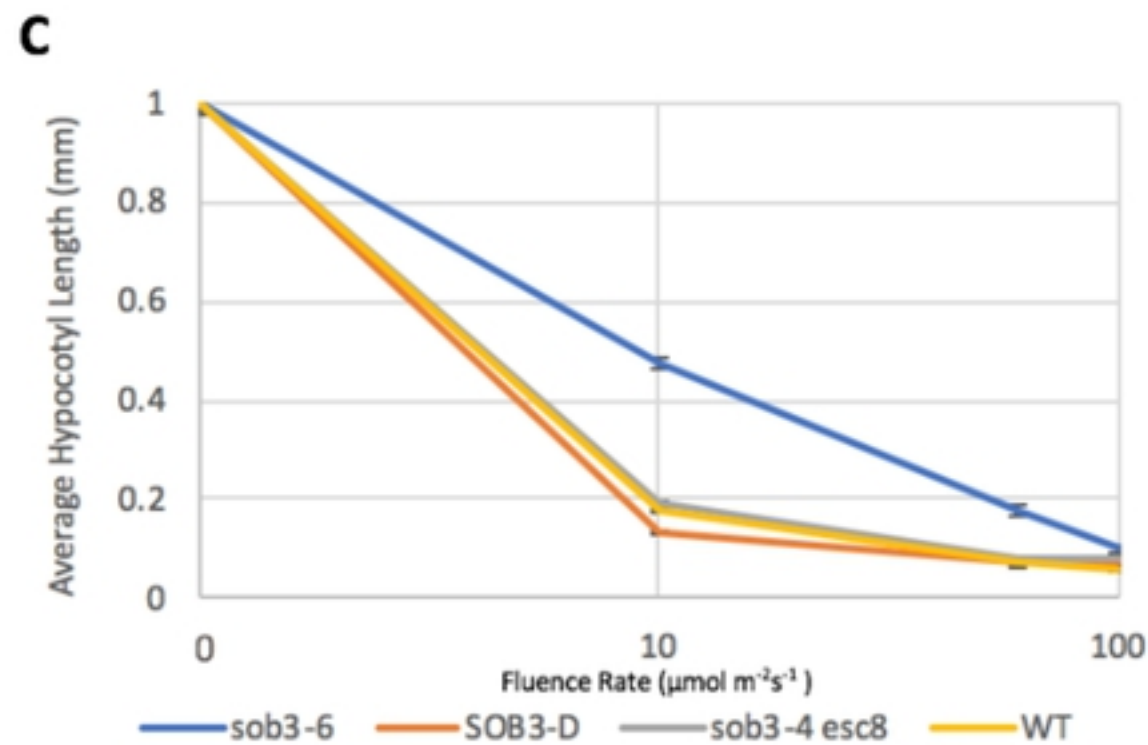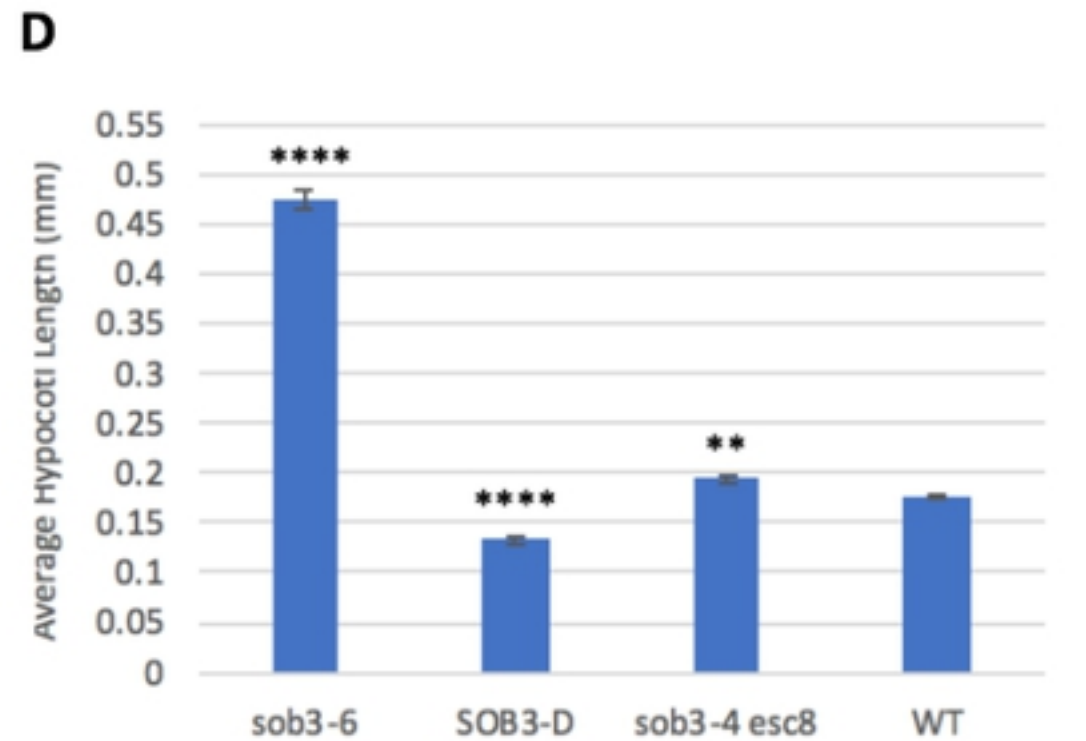

Figure 5

**A**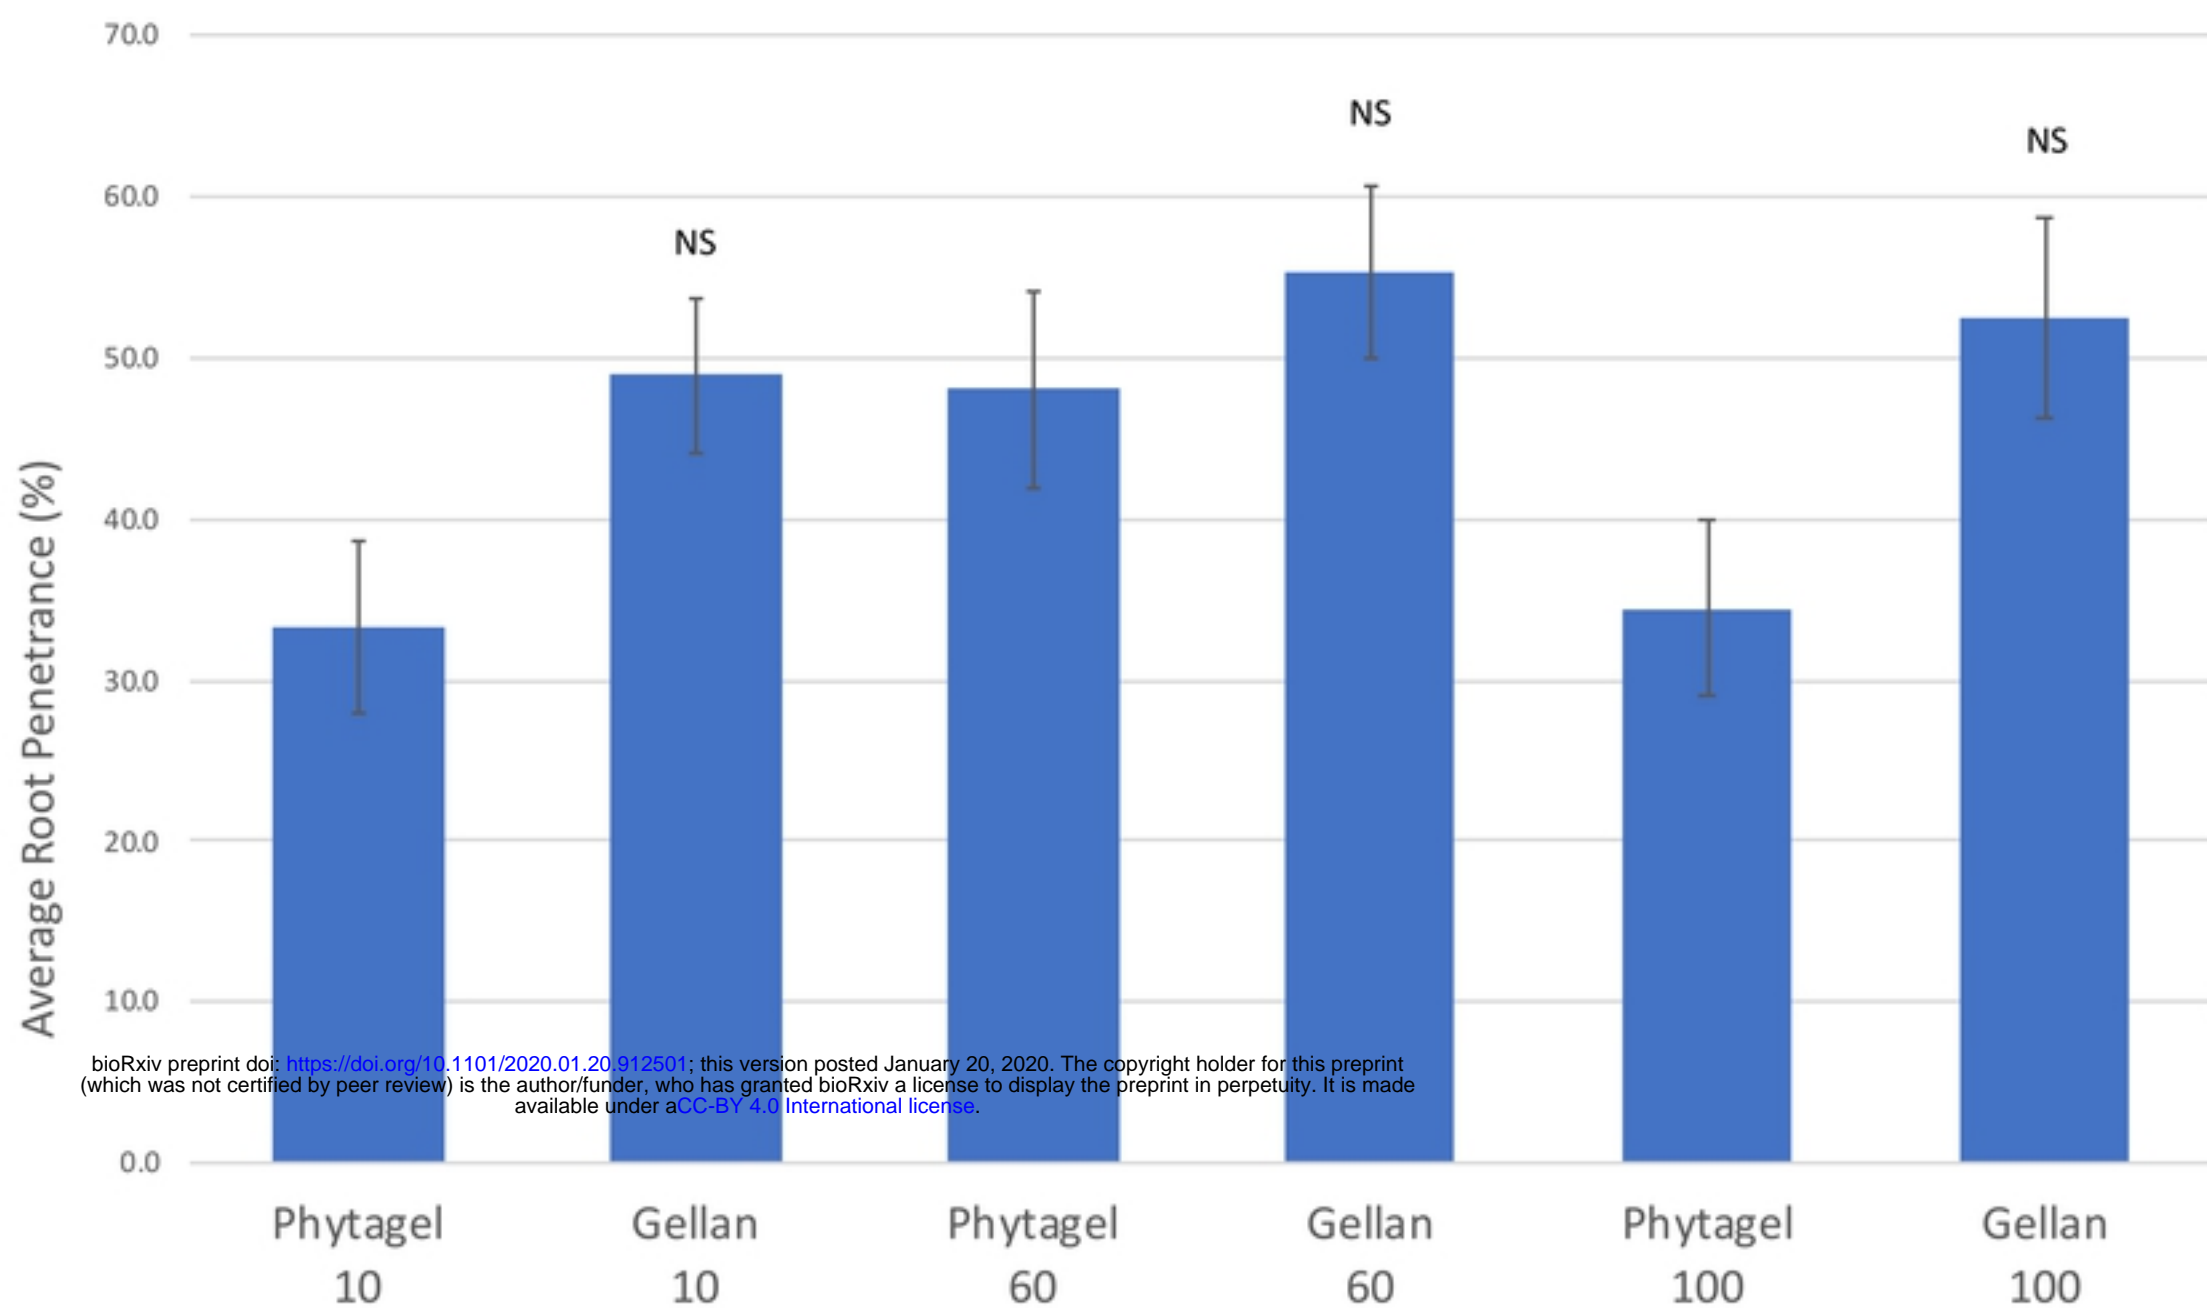**B**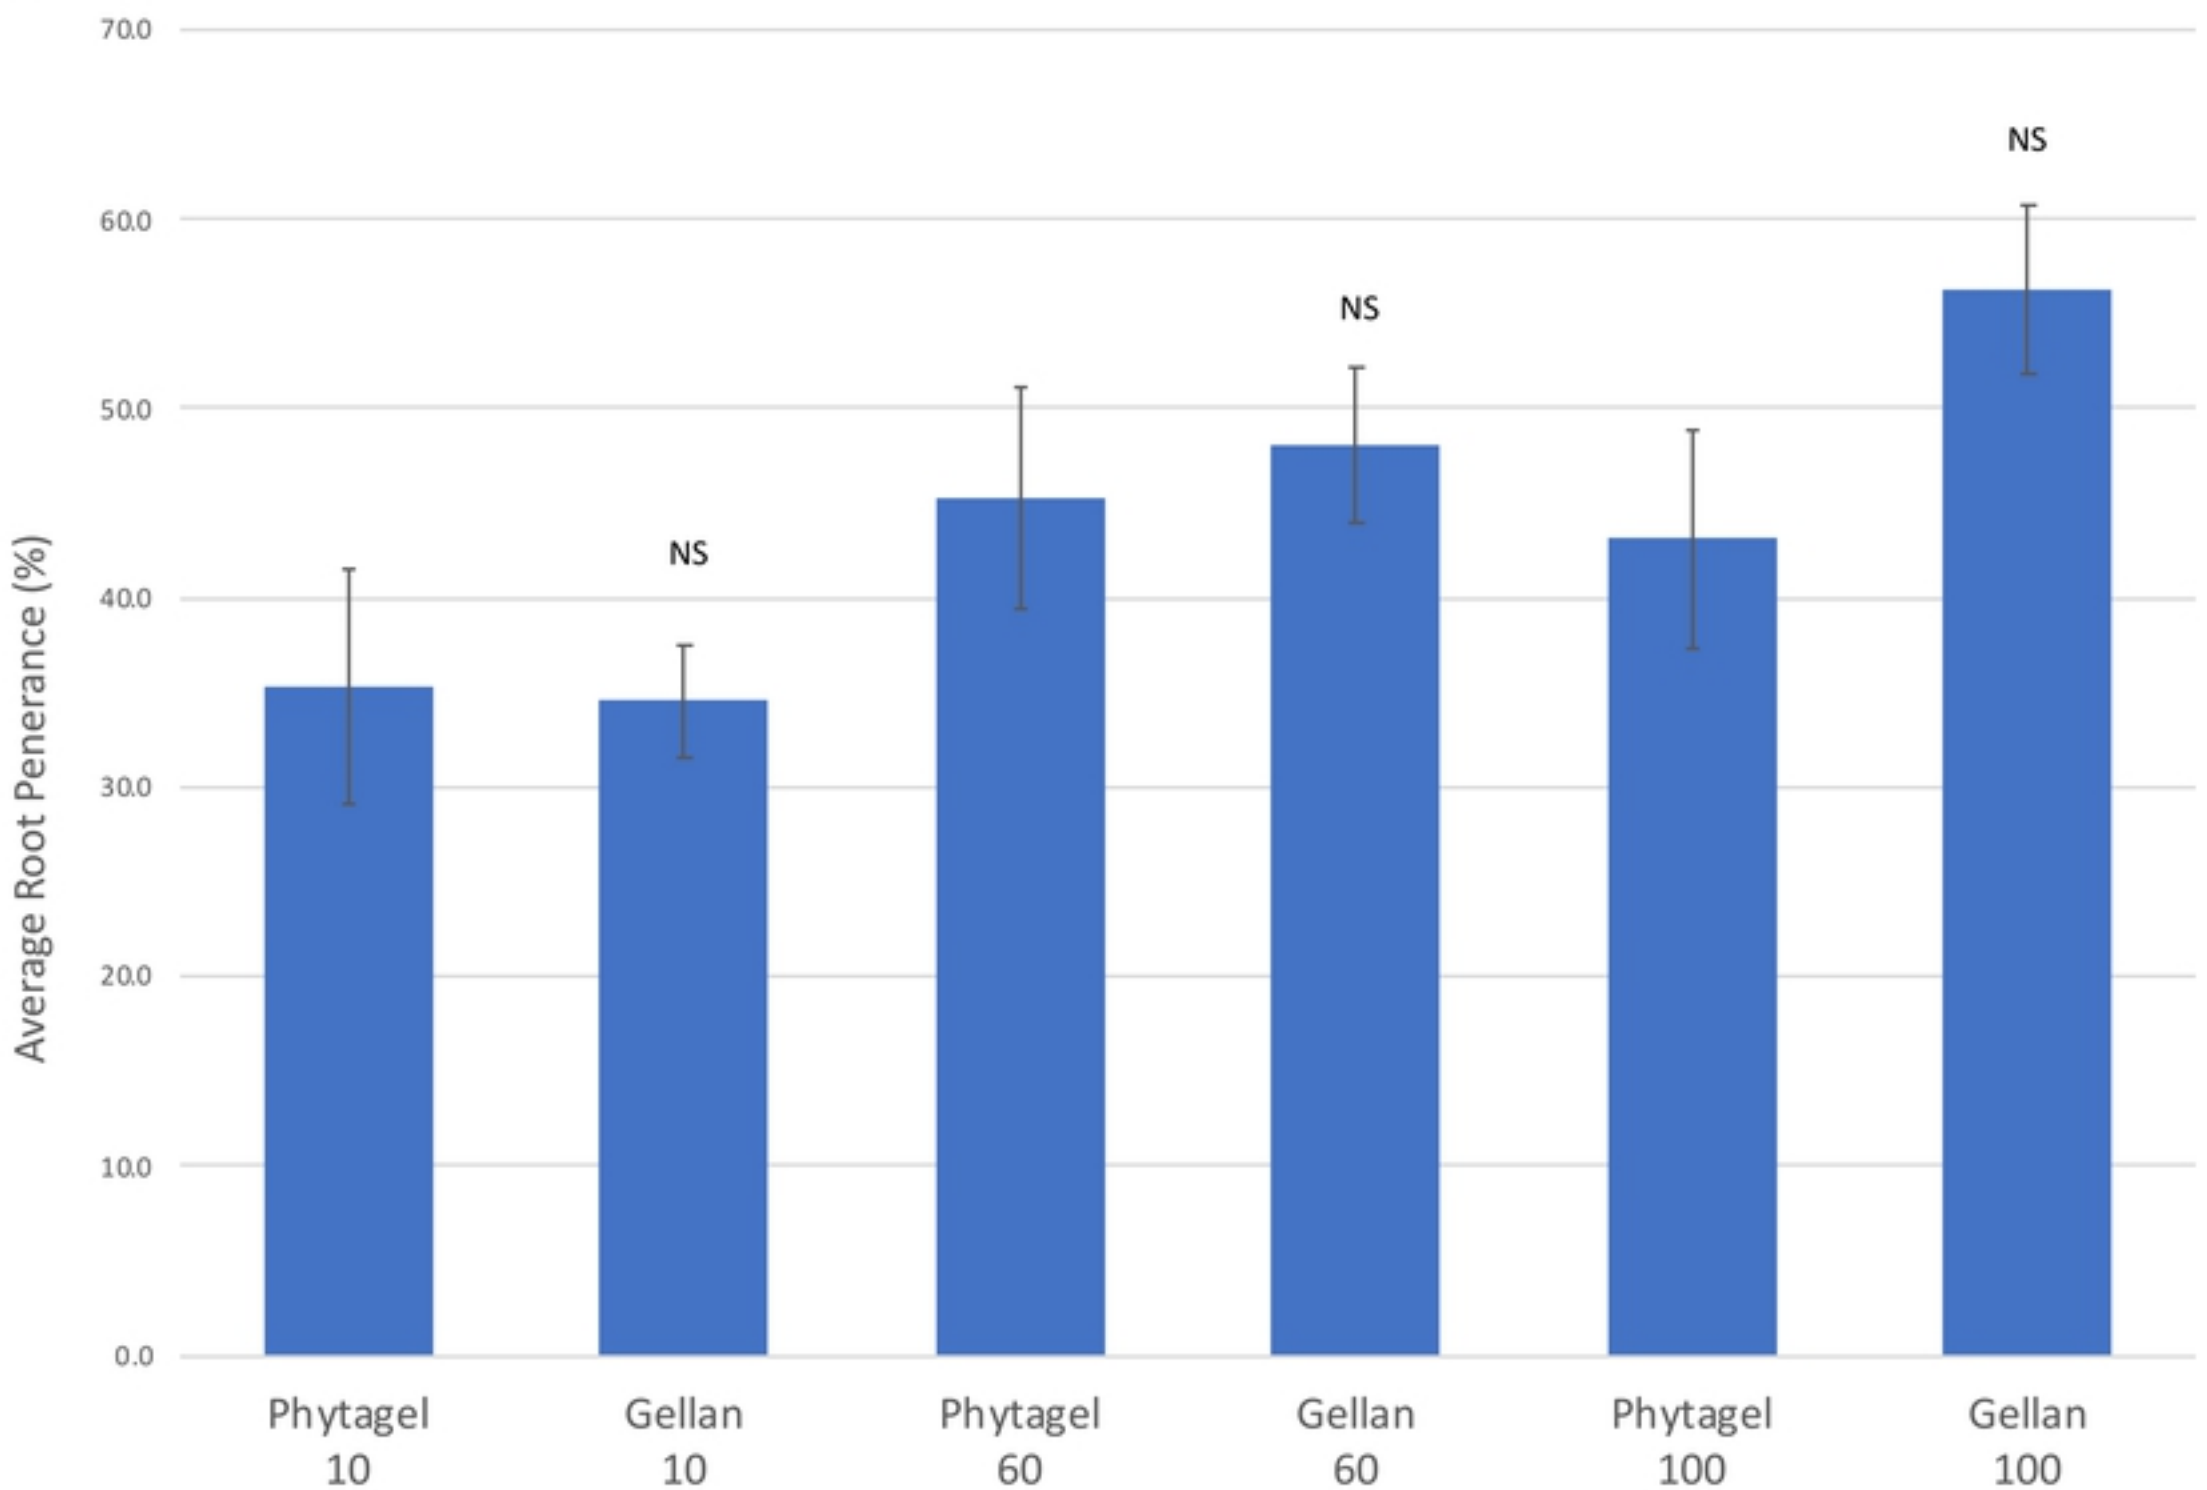**Figure 6**



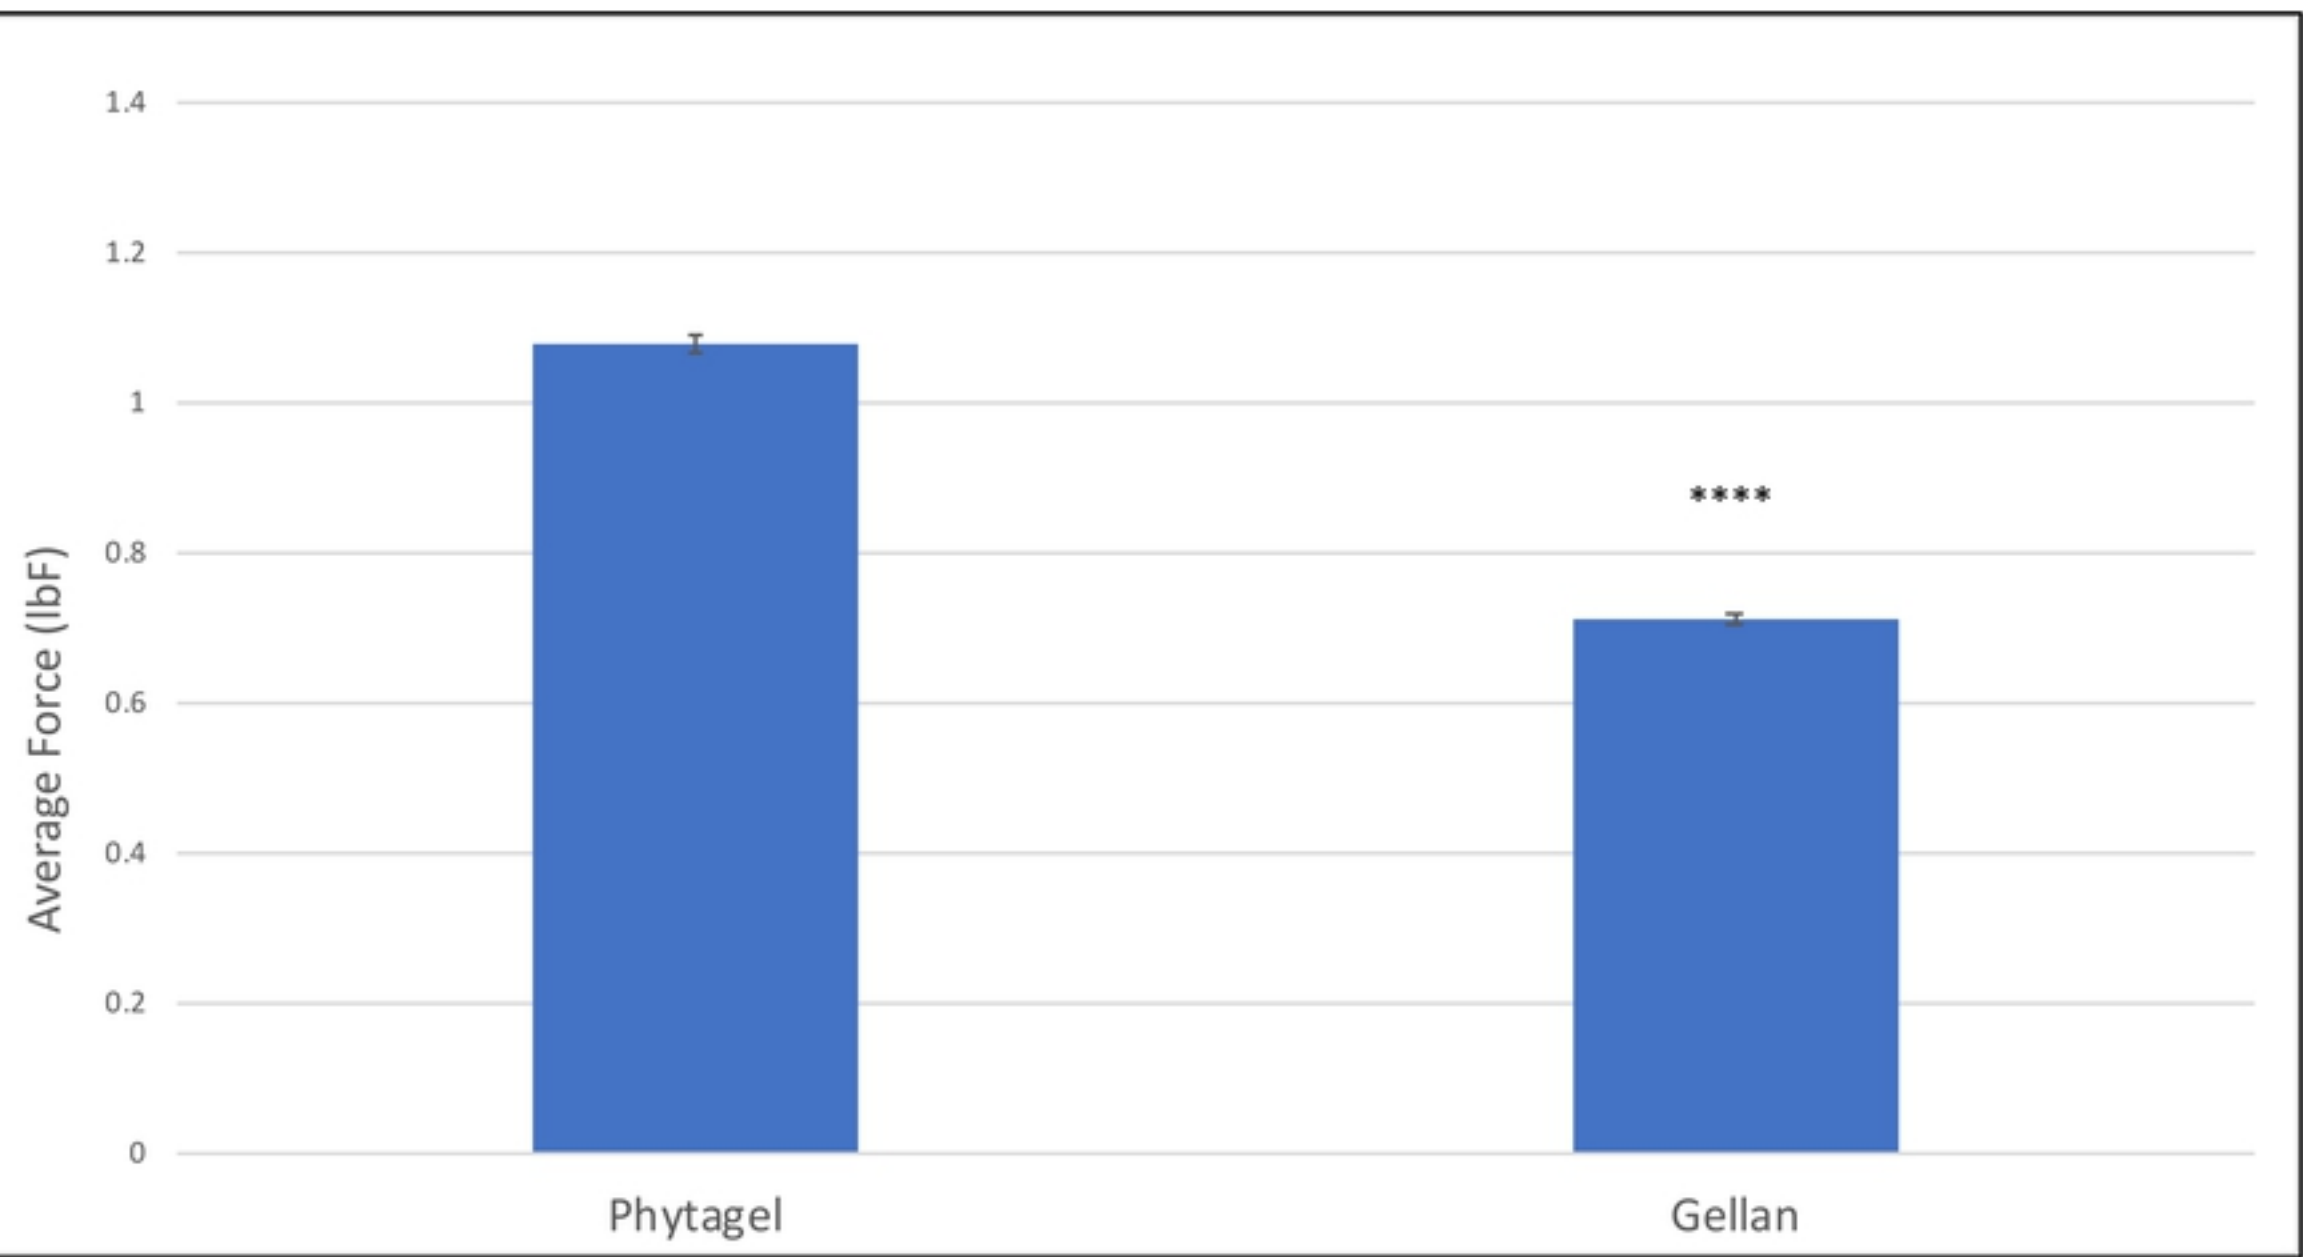

Figure 7



**A**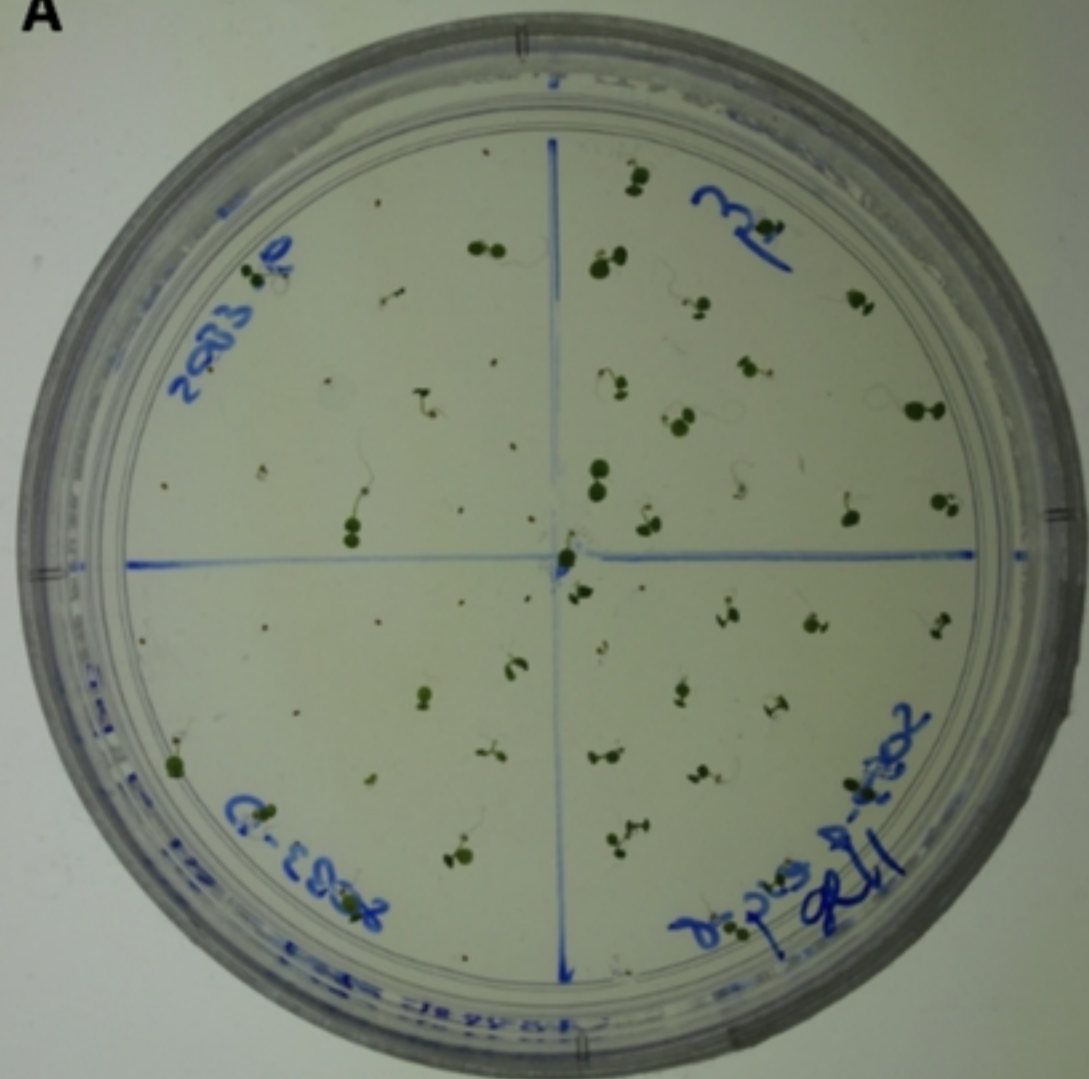**B**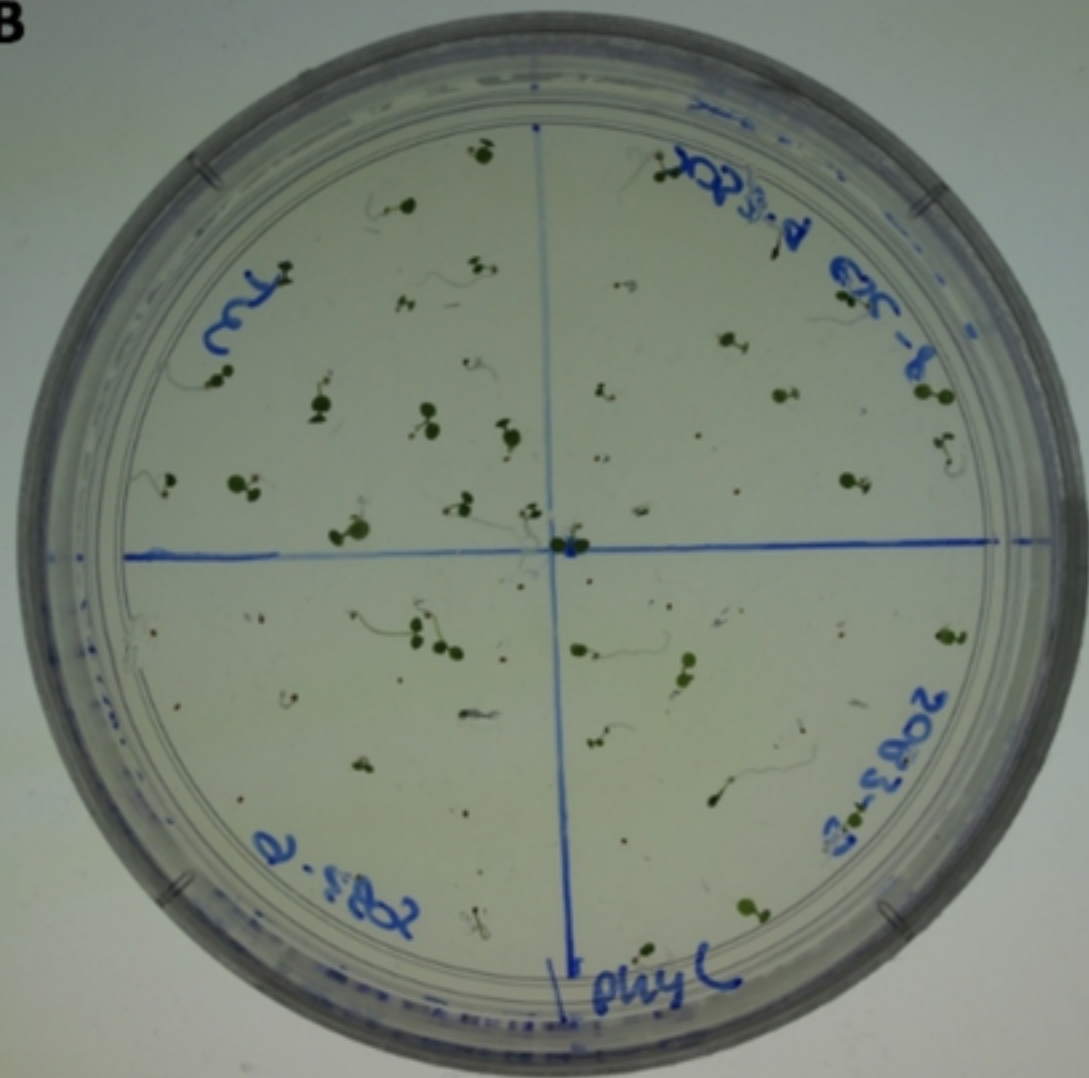

Figure 8

**A**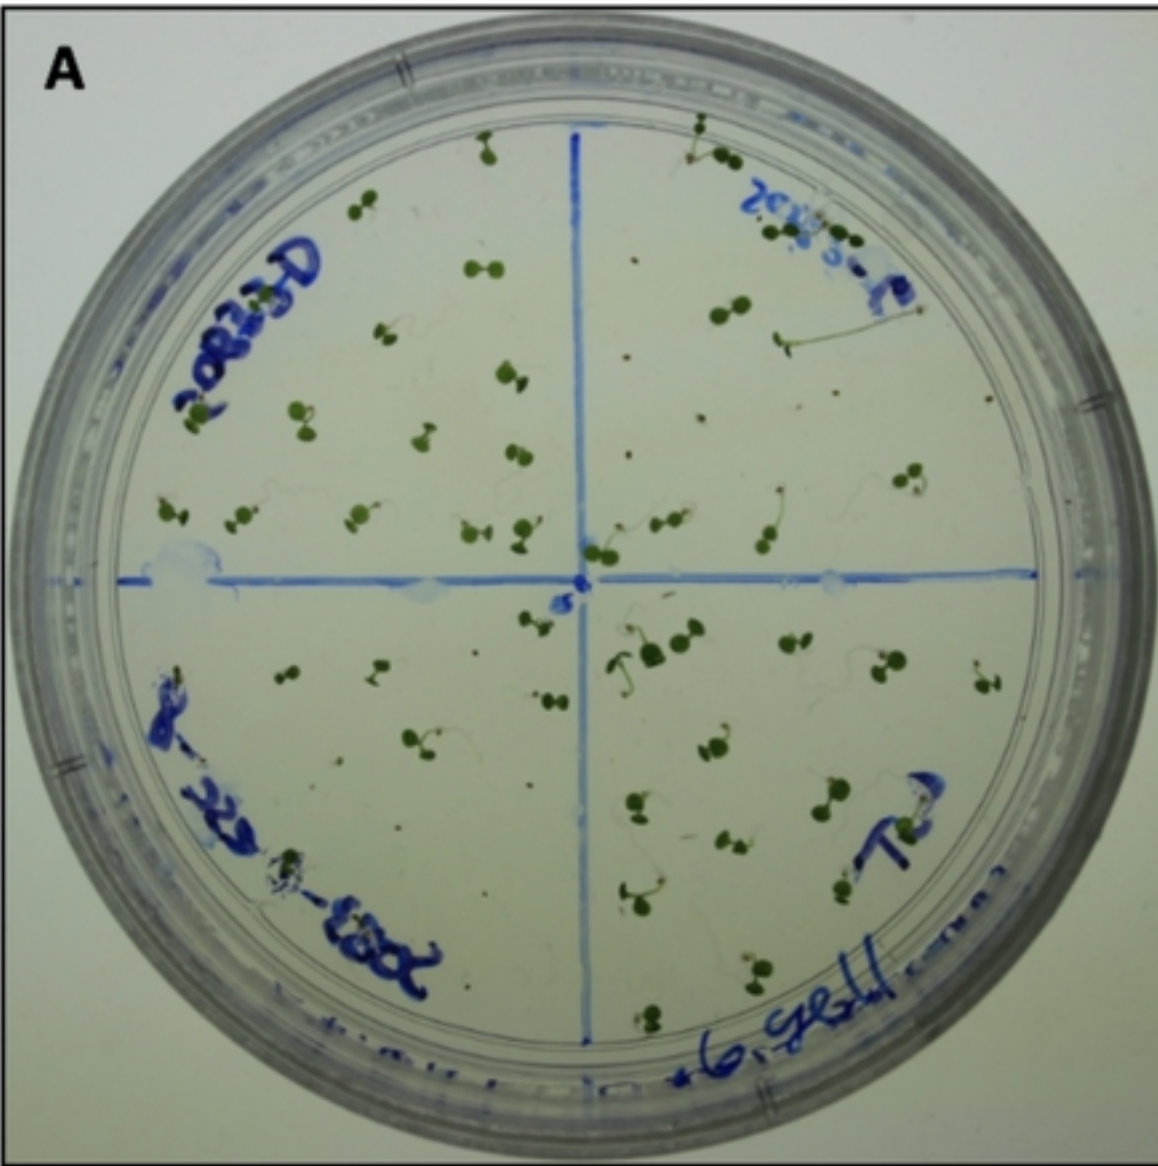**B**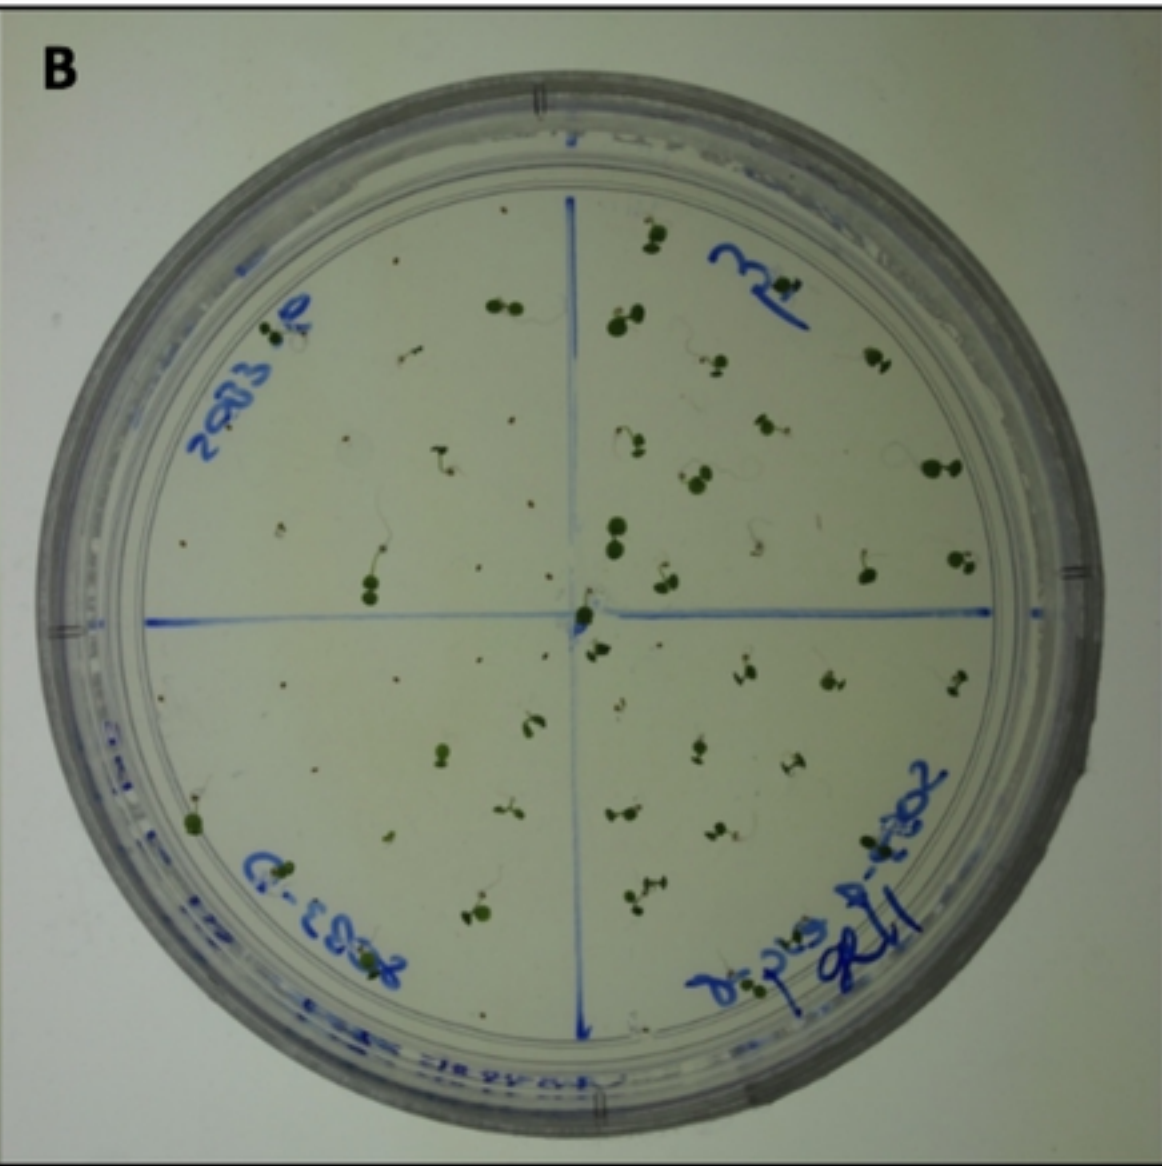

Figure 9

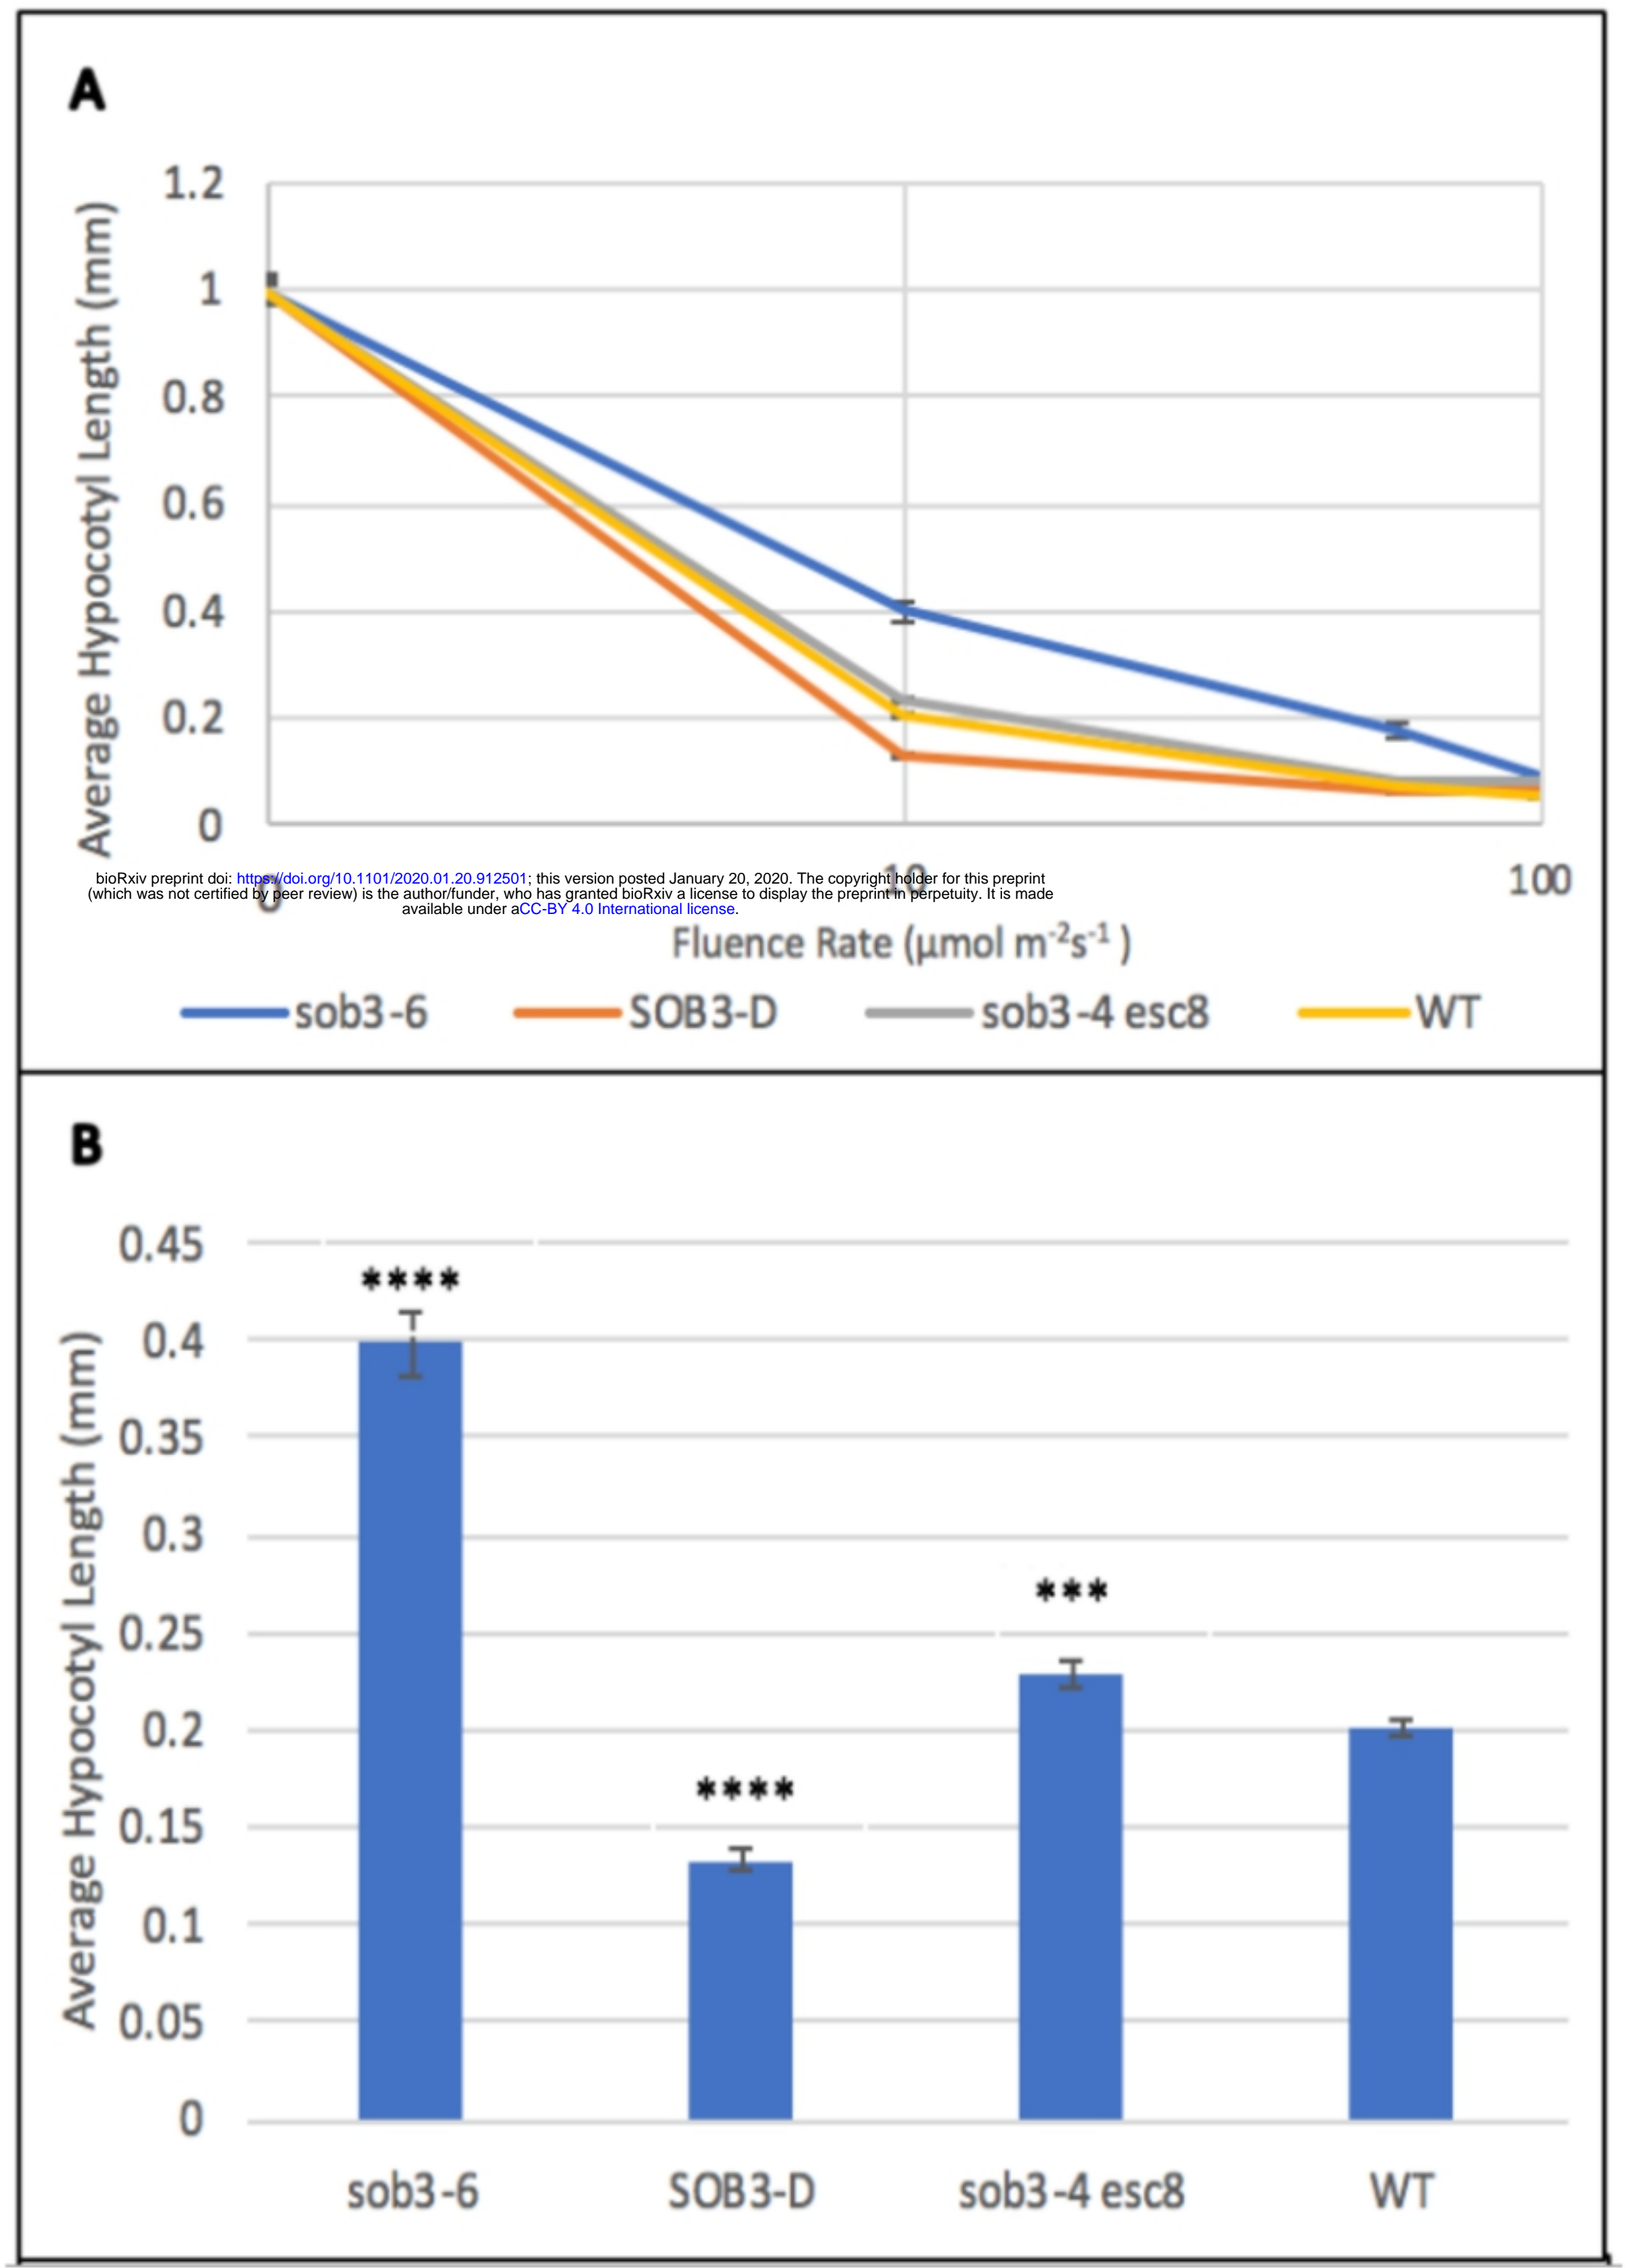

Figure 10



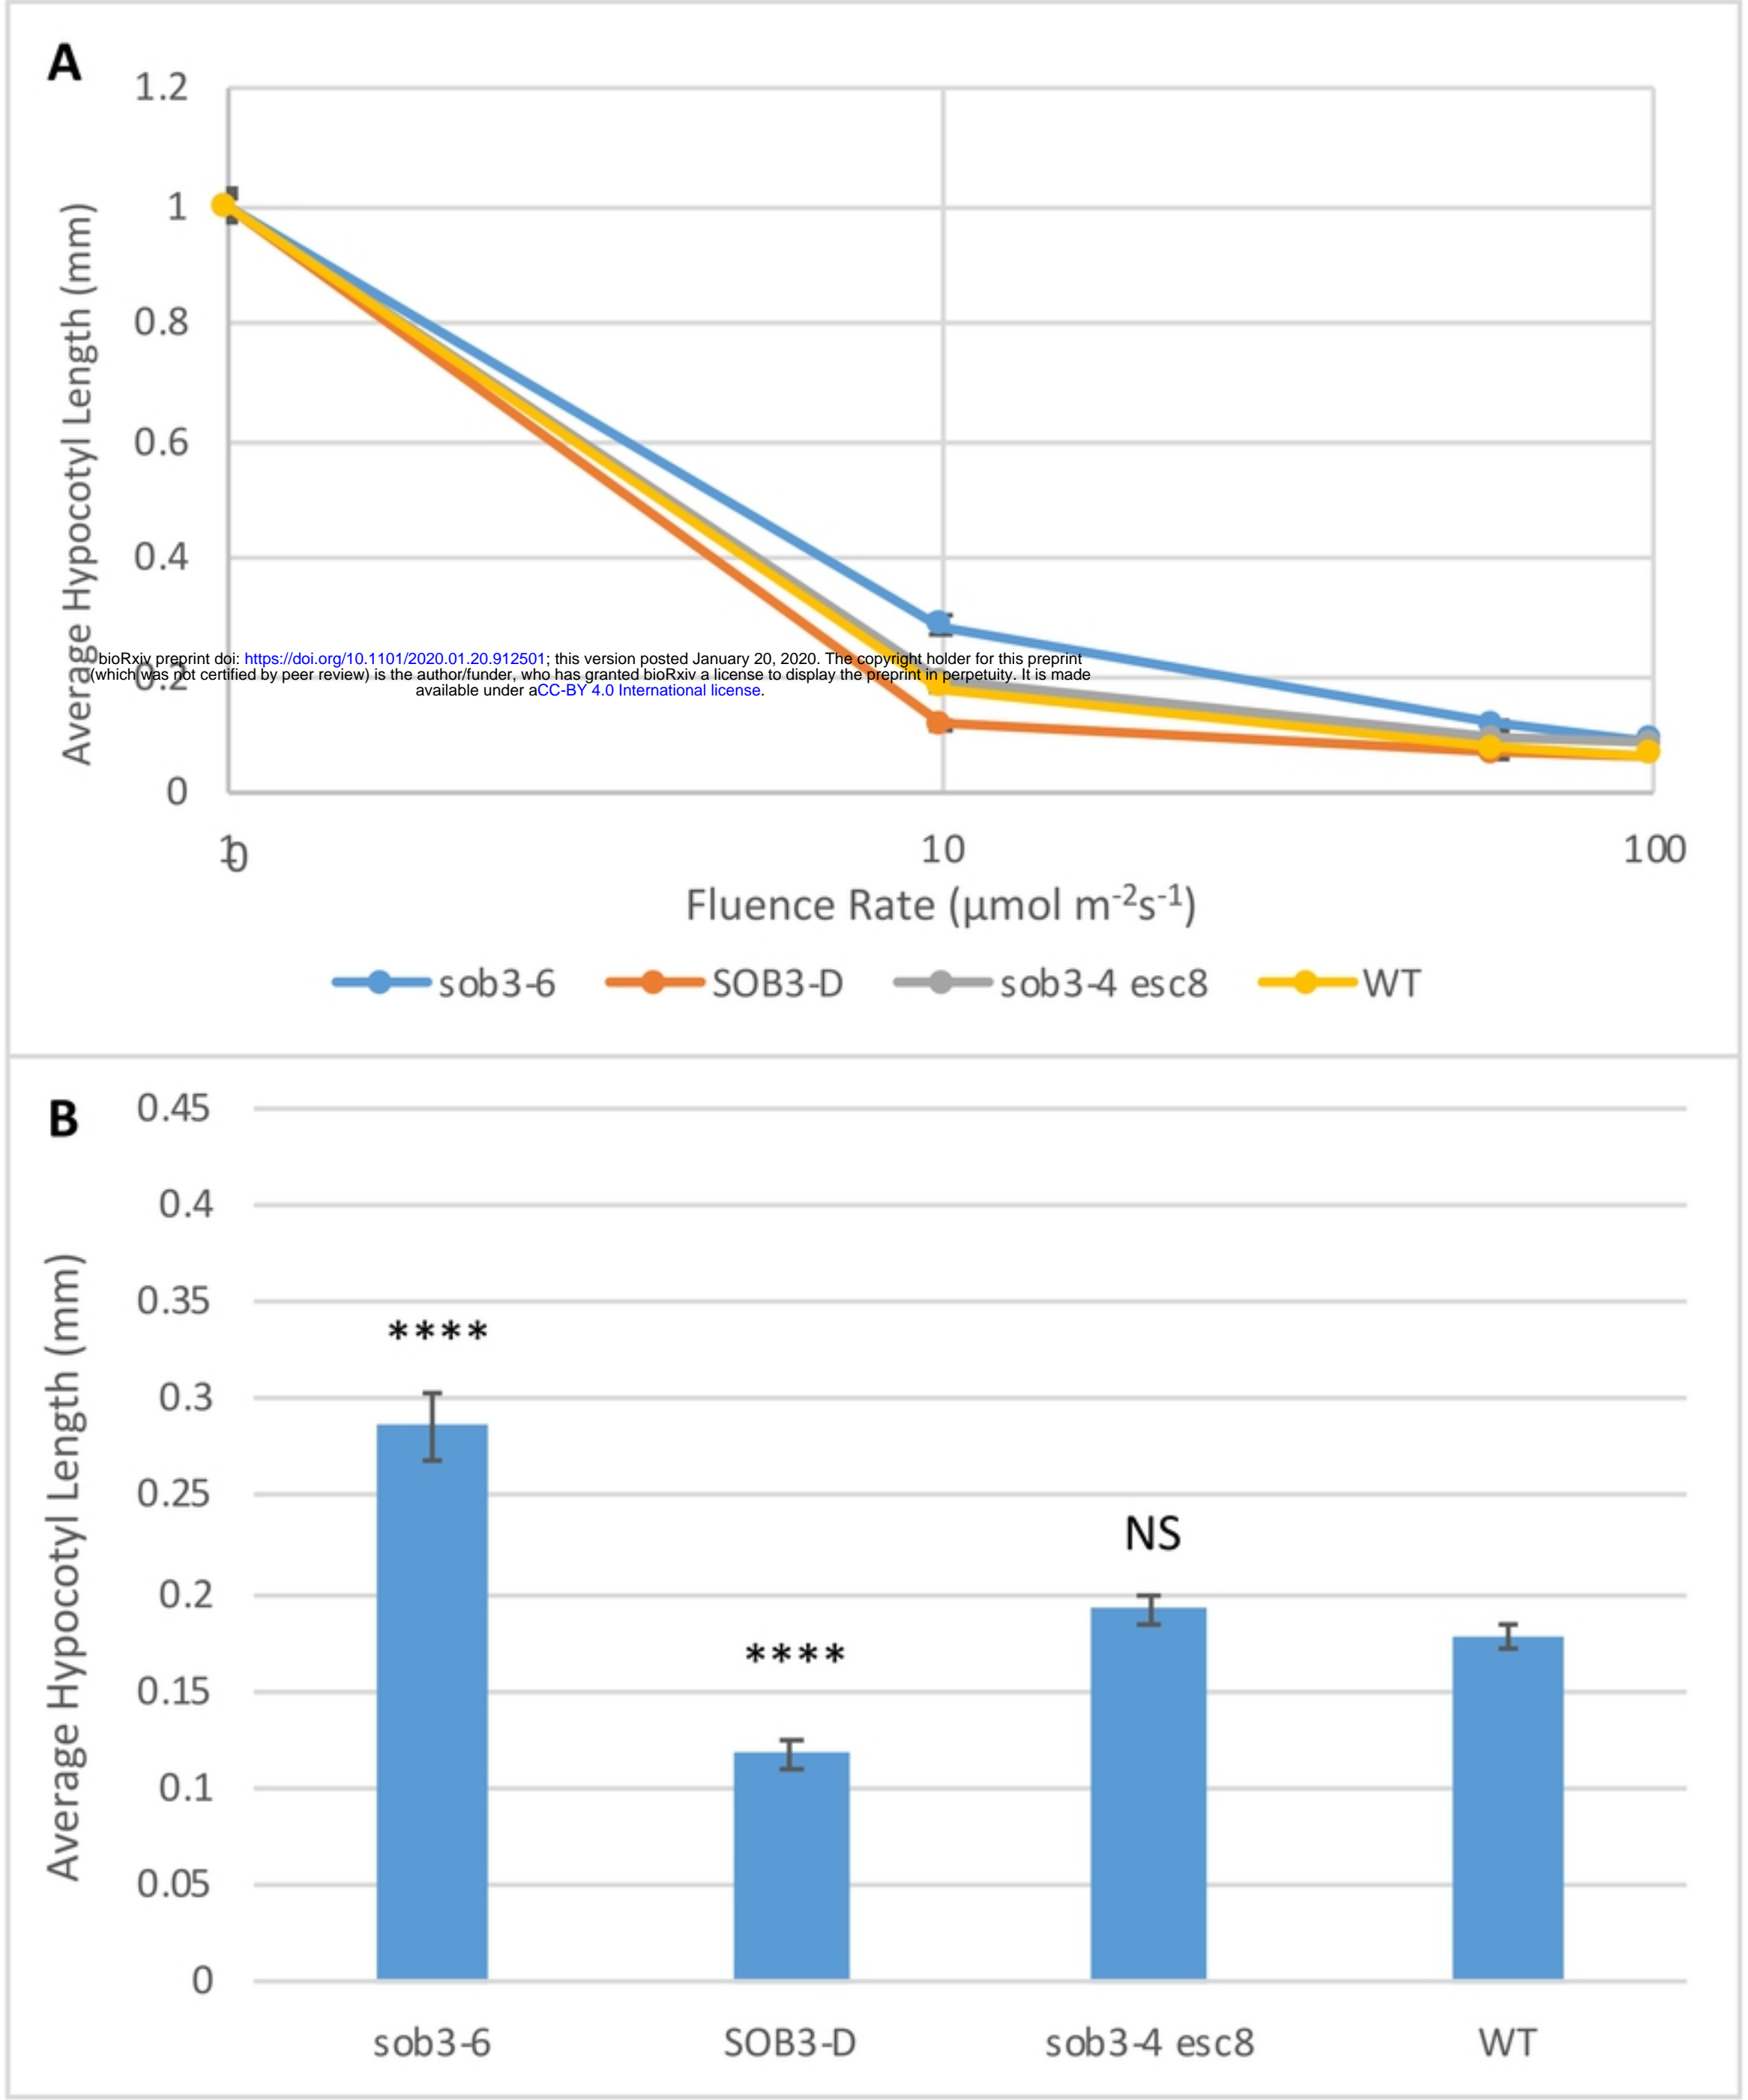

Figure 11
